# Supplementary material for: Harvesting the fragment-based nature of bifunctional organocatalysts to enhance their activity
Source: Royal Society of Chemistry journal article supplement (doi:10.1039/d2qo00550f), 2022-01-01
Supplement: d2qo00550f1.pdf [file d2qo00550f1.pdf]

## Supporting Information for

# Harvesting the Fragment-Based Nature of Bifunctional Organocatalysts to Enhance Their Activity

Simone Gallarati,<sup>†,‡</sup> Ruben Laplaza,<sup>†,‡</sup> and Clemence Corminboeuf<sup>†,‡,#,\*</sup>

<sup>†</sup>Laboratory for Computational Molecular Design, Institute of Chemical Sciences and Engineering, Ecole Polytechnique Fédérale de Lausanne (EPFL), 1015 Lausanne, Switzerland

<sup>‡</sup>National Center for Competence in Research – Catalysis (NCCR-Catalysis), Ecole Polytechnique Fédérale de Lausanne (EPFL), 1015 Lausanne, Switzerland

<sup>#</sup>National Center for Computational Design and Discovery of Novel Materials (MARVEL), Ecole Polytechnique Fédérale de Lausanne (EPFL), 1015 Lausanne, Switzerland

\*Email: [clemence.corminboeuf@epfl.ch](mailto:clemence.corminboeuf@epfl.ch)

## Contents

|                                                                            |     |
|----------------------------------------------------------------------------|-----|
| 1. Computational Details.....                                              | S2  |
| 2. Structure of Class 0–2 Organocatalysts .....                            | S15 |
| 3. Comparison of Potential Energy Surfaces .....                           | S18 |
| 4. Enantioselectivity Prediction of Selected Class 0 Organocatalysts ..... | S19 |
| 5. Computed Electronic Energies and Gibbs Free Energies .....              | S20 |
| 6. References .....                                                        | S35 |

# 1. Computational Details

## 1.1 Linear Free Energy Scaling Relationships

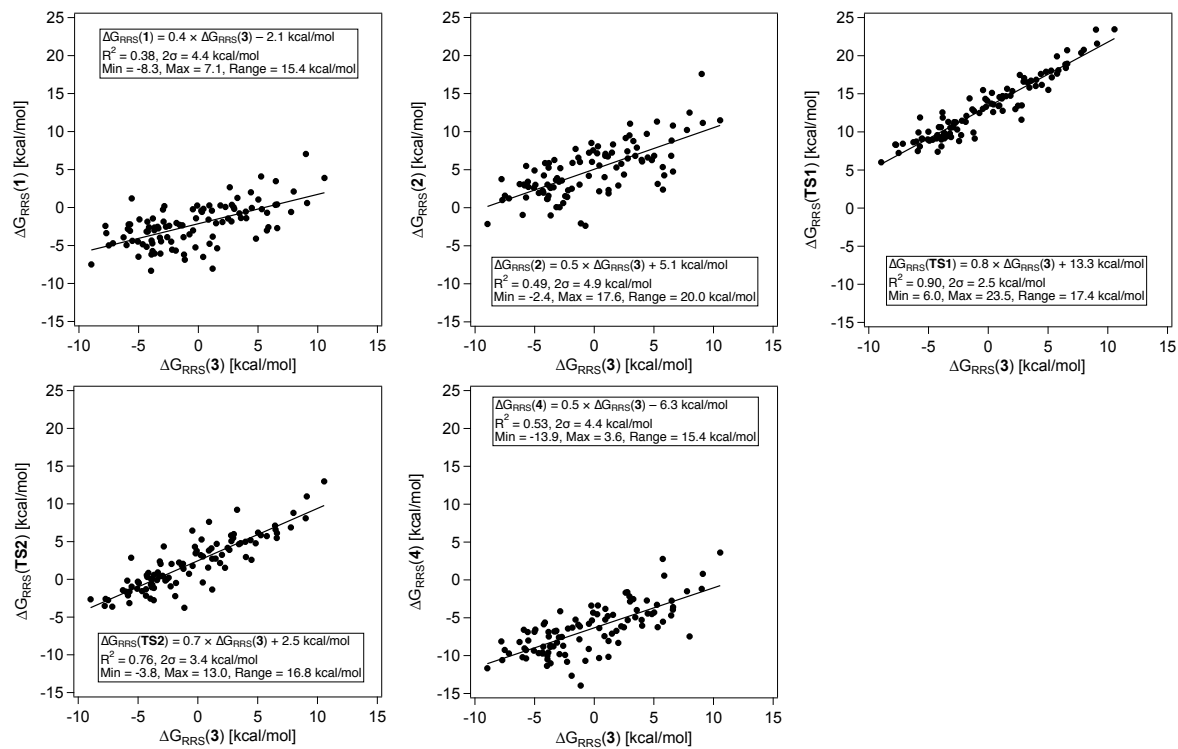

**Figure S1.** Linear free energy scaling relationships of catalytic cycle intermediates (1–4) and transition states TS1–2 for class 0 organocatalysts. X-axis is the chosen descriptor variable,  $\Delta G_{RRS}(3)$ .

## 1.2 Construction of TOF Volcano Plot

The TOF volcano plot was constructed based on the LFESRs shown in Figure S1. Detailed instructions are provided in ref. 1. The open source toolkit volcanic<sup>2</sup> was used to automatically generate the 1D (TOF volcano) and 2D (activity map) plots. The input files for volcanic containing the relative Gibbs Free energies of the class 0 organocatalysts to generate the Figure 2c plot and of the class 1–2 organocatalysts for the Figure 3 activity map are provided in Table S1 and Table S2, respectively. Based on the mean R<sup>2</sup> of 0.57, mean MAE of 1.05 kcal/mol and MAPE of 0.77, volcanic indicates  $\Delta G_{RRS}(3)$  to be the best descriptor for a 1D volcano plot.

**Table S1.** Relative Gibbs free energies (kcal/mol) of class 0 organocatalysts. This is the format of the input file for volcanic.

| Catalyst | Cat | Int1 | Int2 | TS1  | Int3 | TS2  | Int4  | Product |
|----------|-----|------|------|------|------|------|-------|---------|
| Cat0     | 0   | -2.2 | 2.9  | 9.9  | -5.8 | -2.1 | -9.0  | -8.8    |
| Cat1     | 0   | -2.4 | 3.8  | 8.3  | -7.8 | -3.5 | -8.1  | -8.8    |
| Cat2     | 0   | -4.5 | 2.6  | 9.0  | -5.1 | -1.2 | -9.3  | -8.8    |
| Cat3     | 0   | -3.9 | 3.1  | 8.6  | -6.3 | -1.4 | -8.2  | -8.8    |
| Cat4     | 0   | -5.2 | 2.2  | 9.3  | -4.3 | -2.2 | -9.6  | -8.8    |
| Cat5     | 0   | -5.0 | 1.6  | 7.2  | -7.5 | -2.7 | -9.2  | -8.8    |
| Cat6     | 0   | -4.5 | 1.4  | 9.6  | -2.3 | -0.9 | -10.8 | -8.8    |
| Cat7     | 0   | -4.3 | 1.1  | 8.1  | -3.9 | -0.7 | -10.5 | -8.8    |
| Cat8     | 0   | -2.8 | 3.1  | 7.5  | -5.9 | -0.2 | -6.6  | -8.8    |
| Cat9     | 0   | -2.2 | 5.5  | 11.9 | -5.7 | -1.6 | -10.4 | -8.8    |
| Cat10    | 0   | -5.5 | 2.3  | 11.5 | -2.2 | 2.0  | -6.4  | -8.8    |
| Cat11    | 0   | -3.1 | 1.4  | 8.1  | -5.7 | -3.1 | -9.3  | -8.8    |
| Cat12    | 0   | -2.5 | 2.7  | 9.4  | -3.4 | -0.1 | -8.8  | -8.8    |
| Cat13    | 0   | -1.6 | 3.0  | 8.9  | -4.9 | -0.5 | -6.6  | -8.8    |
| Cat14    | 0   | -3.0 | 2.7  | 9.8  | -3.7 | -2.8 | -8.8  | -8.8    |
| Cat15    | 0   | -6.2 | 3.0  | 9.0  | -3.9 | 0.1  | -10.0 | -8.8    |
| Cat16    | 0   | -3.2 | 2.1  | 9.1  | -4.3 | -1.3 | -9.7  | -8.8    |
| Cat17    | 0   | -3.9 | 0.6  | 10.3 | -2.6 | 0.0  | -8.7  | -8.8    |
| Cat18    | 0   | -1.8 | 0.1  | 10.9 | -2.9 | 0.4  | -9.8  | -8.8    |
| Cat19    | 0   | -7.5 | -2.1 | 6.0  | -9.0 | -2.6 | -11.7 | -8.8    |
| Cat20    | 0   | -1.9 | 2.0  | 9.6  | -4.3 | 0.6  | -8.8  | -8.8    |
| Cat21    | 0   | -4.7 | 1.2  | 8.5  | -7.2 | -3.6 | -9.7  | -8.8    |
| Cat22    | 0   | -3.4 | 1.0  | 8.3  | -7.7 | -2.6 | -10.6 | -8.8    |
| Cat23    | 0   | -1.4 | 6.0  | 13.3 | -0.2 | 3.4  | -5.3  | -8.8    |
| Cat24    | 0   | 2.7  | 9.2  | 17.5 | 2.6  | 3.9  | -1.7  | -8.8    |
| Cat25    | 0   | 0.3  | 6.8  | 13.5 | 0.9  | 3.8  | -5.2  | -8.8    |
| Cat26    | 0   | -2.3 | 7.7  | 14.4 | -1.6 | 2.2  | -5.2  | -8.8    |
| Cat27    | 0   | 0.3  | 5.3  | 14.7 | 1.9  | 2.2  | -6.7  | -8.8    |
| Cat28    | 0   | -0.6 | 8.1  | 15.1 | 0.3  | 5.3  | -3.4  | -8.8    |
| Cat29    | 0   | -2.0 | 5.9  | 12.1 | -1.8 | -0.5 | -6.3  | -8.8    |
| Cat30    | 0   | -2.7 | 6.3  | 11.3 | -3.4 | 0.9  | -6.8  | -8.8    |
| Cat31    | 0   | -4.4 | 2.7  | 9.1  | -5.5 | -1.0 | -8.0  | -8.8    |
| Cat32    | 0   | 0.3  | 7.5  | 14.1 | -0.1 | 3.8  | -4.3  | -8.8    |
| Cat33    | 0   | -0.8 | 6.8  | 15.8 | 3.4  | 4.7  | -4.9  | -8.8    |
| Cat34    | 0   | -2.6 | 5.9  | 10.6 | -4.1 | 0.9  | -5.6  | -8.8    |
| Cat35    | 0   | -6.2 | 6.0  | 12.8 | -1.2 | 1.4  | -6.2  | -8.8    |
| Cat36    | 0   | -2.5 | 3.6  | 11.3 | -2.7 | -0.2 | -7.5  | -8.8    |
| Cat37    | 0   | 3.5  | 8.8  | 18.4 | 6.5  | 6.6  | -2.7  | -8.8    |
| Cat38    | 0   | -0.2 | 3.1  | 17.2 | 5.3  | 17.6 | -6.2  | -8.8    |
| Cat39    | 0   | 0.6  | 11.2 | 21.6 | 9.1  | 11.0 | 0.8   | -8.8    |
| Cat40    | 0   | -6.5 | 2.2  | 12.6 | 0.4  | -0.4 | -10.3 | -8.8    |
| Cat41    | 0   | 4.1  | 11.3 | 18.0 | 5.3  | 5.8  | -3.3  | -8.8    |
| Cat42    | 0   | -4.9 | -0.9 | 8.7  | -6.0 | -1.6 | -10.2 | -8.8    |
| Cat43    | 0   | -2.3 | 6.6  | 13.0 | -1.3 | 1.8  | -5.9  | -8.8    |
| Cat44    | 0   | -3.9 | 3.0  | 9.9  | -1.2 | 2.1  | -7.8  | -8.8    |
| Cat45    | 0   | -0.2 | 11.0 | 17.1 | 3.0  | 6.0  | -2.9  | -8.8    |
| Cat46    | 0   | 3.9  | 11.5 | 23.5 | 10.6 | 13.0 | 3.6   | -8.8    |
| Cat47    | 0   | -0.4 | 7.2  | 13.7 | 0.2  | 3.2  | -4.5  | -8.8    |
| Cat48    | 0   | -4.7 | 1.6  | 9.4  | -3.9 | -1.0 | -9.6  | -8.8    |
| Cat49    | 0   | -2.1 | 7.2  | 14.7 | 1.5  | 2.7  | -7.1  | -8.8    |
| Cat50    | 0   | 2.0  | 9.7  | 17.6 | 4.4  | 5.2  | -2.7  | -8.8    |
| Cat51    | 0   | -3.0 | 5.4  | 19.9 | 5.7  | 15.3 | 2.8   | -8.8    |
| Cat52    | 0   | -0.7 | 2.4  | 17.6 | 5.8  | 5.7  | -5.5  | -8.8    |
| Cat53    | 0   | -6.1 | 0.1  | 10.6 | -3.2 | 2.4  | -6.7  | -8.8    |
| Cat54    | 0   | -0.2 | 5.6  | 13.6 | 0.4  | 3.0  | -6.4  | -8.8    |
| Cat55    | 0   | -0.1 | 6.6  | 16.2 | 4.5  | 2.6  | -4.4  | -8.8    |
| Cat56    | 0   | -0.5 | 6.3  | 16.0 | 4.0  | 5.0  | -5.3  | -8.8    |

|        |   |      |      |      |      |      |       |      |
|--------|---|------|------|------|------|------|-------|------|
| Cat57  | 0 | -0.4 | 6.7  | 14.4 | 1.1  | 4.1  | -4.8  | -8.8 |
| Cat58  | 0 | 0.2  | 5.2  | 11.3 | -2.9 | 4.4  | -4.1  | -8.8 |
| Cat59  | 0 | -4.0 | 3.7  | 9.8  | -3.2 | 0.4  | -6.8  | -8.8 |
| Cat60  | 0 | -0.2 | 4.2  | 13.0 | -0.5 | 6.5  | -9.1  | -8.8 |
| Cat61  | 0 | -1.4 | 5.9  | 11.9 | -3.8 | -0.7 | -7.5  | -8.8 |
| Cat62  | 0 | 1.3  | 8.8  | 16.5 | 3.3  | 9.2  | -2.5  | -8.8 |
| Cat63  | 0 | -1.6 | 4.0  | 13.4 | 0.9  | 1.6  | -7.4  | -8.8 |
| Cat64  | 0 | -0.3 | 3.4  | 10.6 | -3.0 | 0.5  | -7.6  | -8.8 |
| Cat65  | 0 | -5.7 | 2.5  | 11.3 | -1.9 | -2.2 | -12.7 | -8.8 |
| Cat66  | 0 | -4.8 | 1.9  | 9.0  | -4.7 | -1.6 | -9.7  | -8.8 |
| Cat67  | 0 | -1.4 | 7.9  | 16.7 | 3.6  | 4.8  | -4.0  | -8.8 |
| Cat68  | 0 | 0.4  | 10.8 | 20.7 | 6.6  | 5.5  | -3.9  | -8.8 |
| Cat69  | 0 | -8.3 | 1.2  | 10.6 | -4.0 | -2.6 | -11.4 | -8.8 |
| Cat70  | 0 | -5.7 | 5.3  | 12.6 | -3.8 | 0.0  | -6.9  | -8.8 |
| Cat71  | 0 | -2.6 | 2.6  | 9.9  | -3.7 | -1.1 | -8.7  | -8.8 |
| Cat72  | 0 | -8.0 | 2.3  | 14.7 | 1.2  | -1.3 | -10.1 | -8.8 |
| Cat73  | 0 | -2.7 | 4.8  | 18.9 | 6.6  | 6.1  | -3.6  | -8.8 |
| Cat74  | 0 | -4.1 | 6.3  | 17.9 | 4.8  | 4.8  | -4.5  | -8.8 |
| Cat75  | 0 | -0.6 | 10.2 | 20.4 | 7.8  | 6.9  | -1.5  | -8.8 |
| Cat76  | 0 | -4.8 | 7.1  | 14.6 | 0.9  | 7.6  | -3.8  | -8.8 |
| Cat77  | 0 | -3.0 | 7.2  | 15.5 | -0.4 | 1.8  | -5.8  | -8.8 |
| Cat78  | 0 | -1.4 | 6.1  | 16.8 | 4.0  | 3.0  | -6.0  | -8.8 |
| Cat79  | 0 | 0.1  | 9.5  | 16.6 | 2.9  | 5.5  | -2.2  | -8.8 |
| Cat80  | 0 | -6.1 | -1.0 | 9.2  | -3.7 | 0.6  | -11.0 | -8.8 |
| Cat81  | 0 | 1.2  | 3.4  | 9.1  | -5.6 | 2.9  | -6.9  | -8.8 |
| Cat82  | 0 | -1.9 | 2.9  | 15.4 | 2.0  | 3.3  | -8.3  | -8.8 |
| Cat83  | 0 | 0.4  | 6.8  | 18.9 | 6.4  | 7.1  | -4.7  | -8.8 |
| Cat84  | 0 | -3.8 | 1.9  | 12.8 | 1.2  | 2.7  | -8.1  | -8.8 |
| Cat85  | 0 | -2.6 | 4.3  | 18.1 | 5.9  | 16.5 | 0.6   | -8.8 |
| Cat86  | 0 | -3.5 | -2.4 | 12.5 | -0.7 | 0.7  | -10.7 | -8.8 |
| Cat87  | 0 | 0.4  | 6.5  | 13.5 | 2.8  | 5.1  | -5.3  | -8.8 |
| Cat88  | 0 | -6.9 | -2.1 | 9.1  | -1.1 | -3.8 | -13.9 | -8.8 |
| Cat89  | 0 | -2.4 | 1.5  | 8.8  | -2.4 | 0.2  | -9.9  | -8.8 |
| Cat90  | 0 | -1.4 | 4.4  | 13.4 | 2.5  | 4.2  | -6.3  | -8.8 |
| Cat91  | 0 | 1.1  | 6.8  | 15.5 | 5.0  | 6.2  | -4.3  | -8.8 |
| Cat92  | 0 | -3.2 | 4.3  | 7.4  | -4.2 | 0.3  | -5.9  | -8.8 |
| Cat93  | 0 | -4.4 | 3.9  | 9.3  | -3.1 | 2.1  | -8.3  | -8.8 |
| Cat94  | 0 | 0.1  | 5.8  | 13.0 | 2.3  | 1.5  | -6.1  | -8.8 |
| Cat95  | 0 | -1.8 | 7.4  | 11.6 | 2.8  | 5.8  | -1.6  | -8.8 |
| Cat96  | 0 | -5.2 | 8.5  | 14.3 | -0.2 | 4.3  | -3.4  | -8.8 |
| Cat97  | 0 | -5.4 | 8.3  | 15.7 | 1.6  | 4.7  | -4.6  | -8.8 |
| Cat98  | 0 | 2.1  | 12.5 | 20.8 | 8.0  | 8.8  | -7.5  | -8.8 |
| Cat99  | 0 | 7.1  | 17.6 | 23.4 | 9.0  | 8.1  | -1.2  | -8.8 |
| Cat100 | 0 | -6.5 | 4.9  | 10.0 | -5.0 | -0.3 | -6.9  | -8.8 |

**Table S2.** Relative Gibbs free energies (kcal/mol) of class 1–2 organocatalysts.

| Catalyst | Cat | Int1 | Int2 | TS1 | Int3 | TS2  | Int4  | Product |
|----------|-----|------|------|-----|------|------|-------|---------|
| Cat101   | 0   | -1.4 | 3.6  | 6.3 | -6.0 | 0.4  | -6.3  | -8.8    |
| Cat102   | 0   | -4.2 | 1.1  | 7.2 | -6.2 | -1.0 | -7.9  | -8.8    |
| Cat103   | 0   | -3.7 | 1.7  | 5.9 | -6.9 | -2.3 | -8.1  | -8.8    |
| Cat104   | 0   | -5.8 | 2.6  | 9.9 | -4.9 | 1.0  | -5.7  | -8.8    |
| Cat105   | 0   | -4.2 | 2.6  | 6.7 | -4.9 | 0.8  | -6.7  | -8.8    |
| Cat106   | 0   | -4.4 | 2.4  | 5.5 | -6.2 | 0.1  | -6.9  | -8.8    |
| Cat107   | 0   | -4.1 | 2.6  | 5.8 | -6.0 | -0.4 | -5.5  | -8.8    |
| Cat108   | 0   | -2.5 | 3.1  | 5.4 | -6.9 | -0.6 | -8.5  | -8.8    |
| Cat109   | 0   | -3.7 | 1.9  | 5.6 | -7.0 | 0.3  | -8.6  | -8.8    |
| Cat110   | 0   | -7.2 | -0.3 | 2.7 | -9.5 | -5.3 | -10.4 | -8.8    |
| Cat111   | 0   | -6.6 | 0.8  | 3.6 | -8.6 | -3.5 | -11.6 | -8.8    |
| Cat112   | 0   | -1.7 | 4.5  | 7.7 | -4.2 | 1.5  | -6.3  | -8.8    |
| Cat113   | 0   | -3.5 | 1.9  | 6.0 | -6.4 | -2.8 | -9.9  | -8.8    |
| Cat114   | 0   | -3.2 | 4.9  | 6.3 | -5.8 | -0.4 | -6.7  | -8.8    |
| Cat115   | 0   | -3.9 | 3.5  | 5.8 | -5.8 | -1.2 | -7.5  | -8.8    |
| Cat116   | 0   | -4.2 | 3.3  | 5.5 | -6.5 | -1.0 | -7.4  | -8.8    |
| Cat117   | 0   | -5.2 | 2.8  | 5.7 | -6.0 | -0.5 | -7.8  | -8.8    |
| Cat118   | 0   | -4.7 | 3.6  | 7.4 | -3.8 | 1.8  | -7.0  | -8.8    |
| Cat119   | 0   | -4.6 | 3.3  | 7.9 | -5.4 | 0.8  | -6.9  | -8.8    |
| Cat120   | 0   | -3.0 | 3.4  | 6.2 | -7.0 | 1.3  | -7.6  | -8.8    |
| Cat121   | 0   | -4.4 | 3.0  | 6.9 | -6.6 | 0.2  | -7.3  | -8.8    |
| Cat122   | 0   | -3.1 | 3.8  | 8.0 | -6.1 | -0.2 | -7.8  | -8.8    |
| Cat123   | 0   | -0.5 | 3.0  | 8.2 | -6.2 | -0.5 | -7.8  | -8.8    |
| Cat124   | 0   | -3.1 | 2.2  | 8.0 | -5.9 | -1.5 | -8.9  | -8.8    |
| Cat125   | 0   | -2.4 | 2.6  | 7.4 | -7.0 | -1.2 | -8.4  | -8.8    |

|        |   |      |      |     |      |      |       |      |
|--------|---|------|------|-----|------|------|-------|------|
| Cat126 | 0 | -3.1 | 2.2  | 9.4 | -4.1 | -0.9 | -9.4  | -8.8 |
| Cat127 | 0 | -2.6 | 2.8  | 5.6 | -7.7 | 0.4  | -8.7  | -8.8 |
| Cat128 | 0 | -2.2 | 2.6  | 6.4 | -6.9 | -0.8 | -8.8  | -8.8 |
| Cat129 | 0 | -5.7 | 2.6  | 5.8 | -7.7 | -2.3 | -10.1 | -8.8 |
| Cat130 | 0 | -3.2 | 3.2  | 6.2 | -5.8 | -1.5 | -8.2  | -8.8 |
| Cat131 | 0 | -2.5 | 2.5  | 7.8 | -7.0 | -0.5 | -7.8  | -8.8 |
| Cat132 | 0 | -8.3 | 0.3  | 4.3 | -7.4 | -5.0 | -12.8 | -8.8 |
| Cat133 | 0 | -2.6 | 1.9  | 6.6 | -7.9 | -1.7 | -8.4  | -8.8 |
| Cat134 | 0 | -4.3 | 1.0  | 6.3 | -8.4 | -2.3 | -10.0 | -8.8 |
| Cat135 | 0 | -1.3 | 2.6  | 6.4 | -7.8 | -1.3 | -7.9  | -8.8 |
| Cat136 | 0 | -4.2 | 2.0  | 8.3 | -5.7 | -1.4 | -9.1  | -8.8 |
| Cat137 | 0 | -2.3 | 3.4  | 5.8 | -6.5 | -0.2 | -7.0  | -8.8 |
| Cat138 | 0 | -1.8 | 4.0  | 5.5 | -6.8 | -0.4 | -8.5  | -8.8 |
| Cat139 | 0 | -8.2 | -0.5 | 5.3 | -8.7 | -5.7 | -13.0 | -8.8 |
| Cat140 | 0 | -2.4 | 3.4  | 4.7 | -7.5 | -2.5 | -9.1  | -8.8 |
| Cat141 | 0 | -2.4 | 1.3  | 5.5 | -9.2 | -2.8 | -9.2  | -8.8 |
| Cat142 | 0 | -2.4 | 1.2  | 5.1 | -8.8 | -2.7 | -9.1  | -8.8 |
| Cat143 | 0 | -2.4 |      | 5.5 | -9.2 | -2.1 | -8.5  | -8.8 |
| Cat144 | 0 | -2.5 | 1.4  | 5.6 | -9.4 | -2.5 | -8.8  | -8.8 |
| Cat145 | 0 | -2.2 | 1.6  | 5.0 | -9.7 | -2.9 | -9.3  | -8.8 |

### 1.3 Multivariate Linear Regression Analysis

The organocatalyst's fragments NCBG, CBG, and BB were optimized following the same methods as in section 1.1, with the only difference that NCBGs were optimized and their single-point energies computed in a dimethyl sulfoxide (DMSO) continuum solvent (with the PCM method), in analogy with typical experimental acidity measurements.<sup>3</sup> NBO charges were calculated using NBO 3.1 in Gaussian16 at the PCM/ $\omega$ B97X-D/Def2-TZVP level.<sup>4</sup>

Conceptual DFT descriptors<sup>5-7</sup> were calculated as follows:

$$\text{Vertical ionization energy } I = E(N-1) - E(N)$$

$$\text{Vertical electron affinity } A = E(N) - E(N+1)$$

where  $E(N)$  stands for the PCM/ $\omega$ B97X-D/Def2-TZVP single-point energy of the  $N$ -electron species,  $E(N-1)$  and  $E(N+1)$  refer to the PCM/ $\omega$ B97X-D/Def2-TZVP energies of the species with  $N-1$  or  $N+1$  electrons, fixed to the optimized  $N$ -electron geometry.

$$\text{Hardness } \eta = (I - A)/2$$

$$\text{Softness } S = 1/\eta$$

$$\text{Electronegativity } \chi = (I + A)/2$$

$$\text{Global electrophilicity index } \omega = \chi^2 / 2\eta$$

$$\text{Global nucleophilicity index} = 1/\omega$$

$$\text{Relative nucleophilicity } N = \varepsilon_{\text{HOMO}} - \varepsilon_{\text{HOMO}(\text{TCNE})}; \text{ TCNE} = \text{tetracyanoethylene}$$

$$\text{Fukui function } f_k^- = \text{NBO}(N)_{[N]} - \text{NBO}(N)_{[N-1]}$$

$$\text{Local nucleophilicity } N_k = \text{relative nucleophilicity } N \times f_k^-$$

where  $\text{NBO}(N)_{[N]}$  is the NBO charge of the CBG nitrogen atom of the  $N$ -electron species, while  $\text{NBO}(N)_{[N-1]}$  is the NBO charge of the CBG nitrogen atom of the  $N-1$ -electron species (fixed to the optimized  $N$ -electron geometry).

The NCBG descriptor  $\Delta G_{\text{PEX}}$  (Gibbs free energy change for proton exchange) and the CBG descriptor  $\Delta G_{\text{ENF}}$  (Gibbs free energy change for enamine formation) were calculated according to equations (1) and (2) in Figure S2.

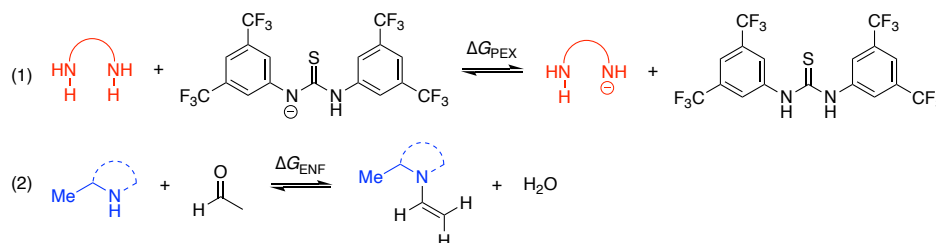

**Figure S2.** Equilibria for proton exchange (1) and enamine formation (2).

Multidimensional Sterimol descriptors were calculated using the toolkit wSterimol by Paton and co-workers interfaced with Gaussian16.<sup>8</sup> Geometry optimizations were performed at the B97-D/Def2-SVP level and CPK atomic radii were used. The “primary bond” was defined as the  $\text{H}_2\text{N}-\text{X}$  bond in the BB fragment.

**Table S3.** NCBG descriptors for MLR analysis.

| NCBG | HOMO (eV) | LUMO (eV) | I (eV) | A (eV) | $\eta$ (eV) | $S$ (1/eV) | $\chi$ (eV) | $\omega$ (eV) | $1/\omega$ (1/eV) | $\Delta G_{\text{PEX}}$ (kcal/mol) |
|------|-----------|-----------|--------|--------|-------------|------------|-------------|---------------|-------------------|------------------------------------|
| 0    | -7.879    | 0.876     | 5.984  | 1.096  | 2.444       | 0.409      | 3.540       | 2.563         | 0.390             | 13.626                             |
| I    | -7.734    | -0.374    | 5.850  | 2.343  | 1.753       | 0.570      | 4.097       | 4.785         | 0.209             | 0.137                              |
| II   | -9.754    | 2.949     | 7.891  | -0.120 | 4.005       | 0.250      | 3.886       | 1.885         | 0.531             | 25.039                             |
| III  | -8.340    | 1.649     | 6.219  | 0.505  | 2.857       | 0.350      | 3.362       | 1.978         | 0.505             | 15.712                             |
| IV   | -8.816    | 2.855     | 6.715  | -0.317 | 3.516       | 0.284      | 3.199       | 1.455         | 0.687             | 28.181                             |
| V    | -8.934    | 1.712     | 6.947  | 0.042  | 3.452       | 0.290      | 3.495       | 1.769         | 0.565             | 14.297                             |
| VI   | -7.939    | 2.587     | 6.060  | -0.131 | 3.096       | 0.323      | 2.965       | 1.420         | 0.704             | 22.331                             |
| VII  | -7.640    | 1.975     | 5.683  | -0.124 | 2.903       | 0.344      | 2.780       | 1.331         | 0.751             | 16.461                             |
| VIII | -7.996    | -0.960    | 6.104  | 2.885  | 1.609       | 0.621      | 4.494       | 6.277         | 0.159             | 4.090                              |
| IX   | -10.356   | 2.540     | 8.468  | -0.144 | 4.306       | 0.232      | 4.162       | 2.011         | 0.497             | 10.700                             |

**Table S4.** CBG descriptors for MLR analysis.

| CBG  | HOMO (eV) | LUMO (eV) | NBO(N) <sub>[N]</sub> | $N$ (eV) | NBO(N) <sub>[N-1]</sub> | $f_k^-$ | $N_k$ (eV) | $\Delta G_{\text{ENF}}$ (kcal/mol) |
|------|-----------|-----------|-----------------------|----------|-------------------------|---------|------------|------------------------------------|
| 0    | -8.594    | 2.860     | -0.633                | 2.341    | -0.047                  | -0.586  | -1.372     | 1.631                              |
| I    | -8.837    | 2.971     | -0.626                | 2.099    | -0.044                  | -0.582  | -1.221     | 2.590                              |
| II   | -8.615    | 2.825     | -0.632                | 2.320    | -0.057                  | -0.575  | -1.334     | 1.861                              |
| III  | -8.515    | 2.762     | -0.638                | 2.420    | -0.065                  | -0.574  | -1.388     | 1.723                              |
| IV   | -8.237    | 2.195     | -0.616                | 2.698    | -0.574                  | -0.043  | -0.115     | 4.918                              |
| V    | -8.216    | 2.198     | -0.637                | 2.719    | -0.599                  | -0.038  | -0.103     | 8.828                              |
| VI   | -8.753    | 2.427     | -0.627                | 2.182    | -0.555                  | -0.073  | -0.159     | 6.977                              |
| VII  | -8.209    | 2.867     | -0.636                | 2.726    | -0.096                  | -0.540  | -1.471     | 3.753                              |
| VIII | -7.412    | 1.461     | -0.601                | 3.524    | -0.346                  | -0.254  | -0.896     | 7.715                              |
| IX   | -8.873    | 2.770     | -0.849                | 2.062    | -0.259                  | -0.590  | -1.217     | 5.611                              |
| X    | -9.002    | 3.018     | -0.840                | 1.933    | -0.189                  | -0.651  | -1.257     | 5.993                              |
| XI   | -8.624    | 1.350     | -0.837                | 2.311    | -0.352                  | -0.484  | -1.120     | 6.070                              |
| XII  | -8.345    | 1.378     | -0.628                | 2.590    | -0.089                  | -0.539  | -1.396     | 3.943                              |
| XIII | -8.570    | 1.252     | -0.830                | 2.365    | -0.768                  | -0.062  | -0.147     | 6.576                              |

**Table S5.** BB descriptors for MLR analysis.

| BB   | HOMO (eV) | LUMO (eV) | wL    | wB1   | wB5   | $v_{(N-H)}$ sym | $i_{(N-H)}$ sym | NBO(N) <sub>[N]</sub> |
|------|-----------|-----------|-------|-------|-------|-----------------|-----------------|-----------------------|
| 0    | -8.210    | 0.395     | 7.410 | 2.330 | 5.050 | 3516.840        | 103.339         | -0.781                |
| I    | -8.281    | 1.210     | 7.330 | 1.720 | 3.780 | 3501.754        | 91.585          | -0.788                |
| II   | -7.274    | 1.347     | 8.840 | 1.780 | 3.610 | 3481.378        | 29.563          | -0.807                |
| III  | -9.009    | 3.112     | 3.350 | 1.630 | 3.650 | 3402.236        | 1.236           | -0.843                |
| IV   | -10.799   | 3.264     | 3.710 | 1.990 | 3.660 | 3469.720        | 36.043          | -0.873                |
| V    | -9.770    | 2.954     | 4.400 | 1.550 | 3.670 | 3261.988        | 13.238          | -0.529                |
| VI   | -8.682    | 1.304     | 5.350 | 1.610 | 6.040 | 3390.607        | 0.384           | -0.826                |
| VII  | -7.322    | 0.439     | 6.750 | 1.820 | 5.700 | 3495.900        | 41.141          | -0.798                |
| VIII | -7.938    | 0.253     | 8.440 | 2.700 | 6.040 | 3406.069        | 0.186           | -0.831                |
| IX   | -8.790    | 2.264     | 6.010 | 3.140 | 5.160 | 3423.121        | 4.687           | -0.837                |
| X    | -7.816    | -0.096    | 9.260 | 3.600 | 7.880 | 3419.073        | 0.478           | -0.828                |
| XI   | -9.138    | 0.212     | 6.730 | 1.590 | 7.170 | 3398.650        | 0.167           | -0.820                |
| XII  | -7.997    | 1.164     | 8.090 | 1.880 | 3.610 | 3513.228        | 95.099          | -0.784                |
| XIII | -8.587    | 0.668     | 8.130 | 2.200 | 3.810 | 3523.675        | 175.890         | -0.770                |

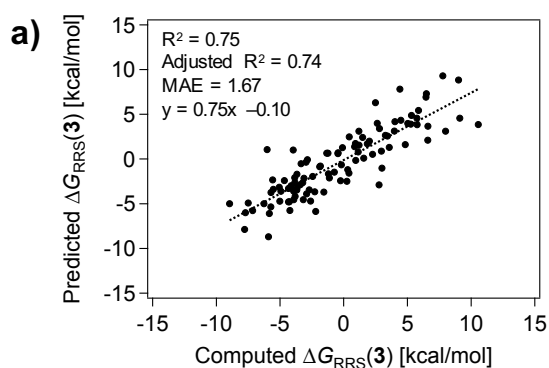

$$\Delta G_{\text{RRS}}(\mathbf{3}) = 4.18 \epsilon_{\text{LUMO,NCBG}} - 3.34 w_{\text{L}_{\text{BB}}} - 1.77 i_{(\text{N-H}),\text{BB}} + 10.46 \Delta G_{\text{ENF,CBG}} + 1.81 N_{\text{k,CBG}} - 3.13$$

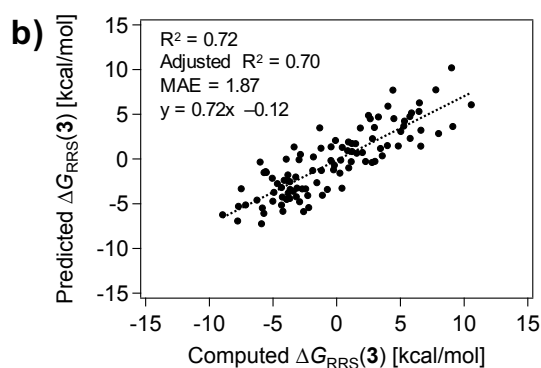

$$\Delta G_{\text{RRS}}(\mathbf{3}) = -4.11 w_{\text{L}_{\text{BB}}} + 11.74 \Delta G_{\text{ENF,CBG}} + 9.15 \eta_{\text{,NCBG}} - 1.81 \epsilon_{\text{LUMO,CBG}} - 0.95 \text{NBO}(\text{N})_{[\text{M}],\text{BB}} - 8.66$$

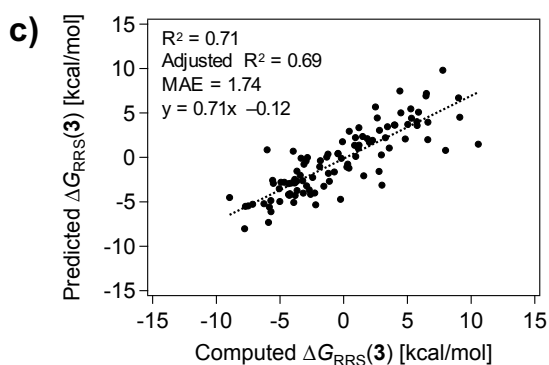

$$\Delta G_{\text{RRS}}(\mathbf{3}) = 5.10 \Delta G_{\text{PEX,NCBG}} - 3.94 w_{\text{L}_{\text{BB}}} - 1.87 i_{(\text{N-H}),\text{BB}} + 10.26 \Delta G_{\text{ENF,CBG}} + 1.93 N_{\text{k,CBG}} - 3.12$$

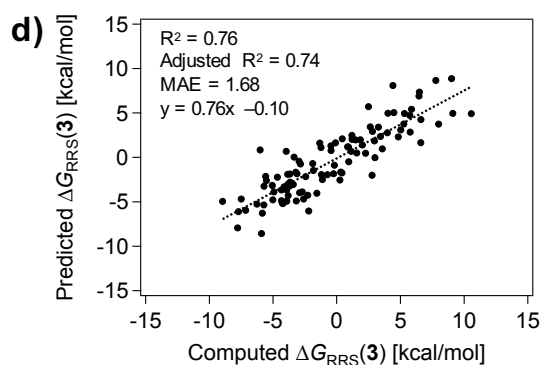

$$\Delta G_{\text{RRS}}(\mathbf{3}) = 2.53 \epsilon_{\text{LUMO,NCBG}} - 3.03 w_{\text{L}_{\text{BB}}} - 2.00 i_{(\text{N-H}),\text{BB}} + 9.74 \Delta G_{\text{ENF,CBG}} + 1.47 N_{\text{k,CBG}} + 3.72 \eta_{\text{,NCBG}} - 2.32 \epsilon_{\text{LUMO,CBG}} + 1.13 \text{NBO}(\text{N})_{[\text{M}],\text{BB}} - 1.92$$

**Figure S3.** Representative MLR models involving  $\Delta G_{\text{RRS}}(\mathbf{3})$  and the fragment parameters. Model *a* is reported in Figure 2d.



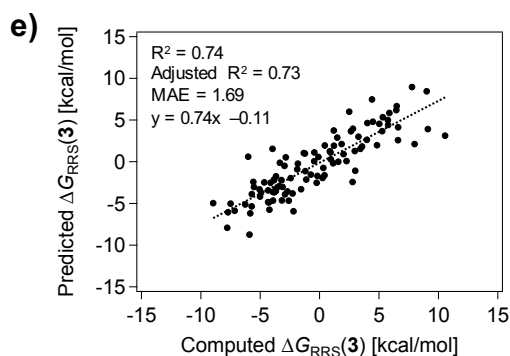

$$\Delta G_{RRS}(3) = 4.09 \epsilon_{LUMO,NCBG} - 3.20 w_{L_{BB}} - 1.87 i_{(N-H),BB} + 12.06 \Delta G_{ENF,CBG} - 5.20$$

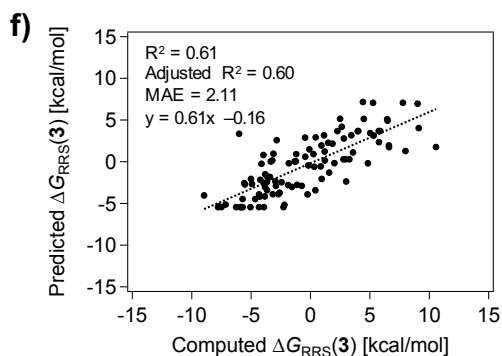

$$\Delta G_{RRS}(3) = -3.49 w_{L_{BB}} - 2.11 i_{(N-H),BB} + 10.43 \Delta G_{ENF,CBG} + 1.30 N_{k,CBG} - 1.24$$

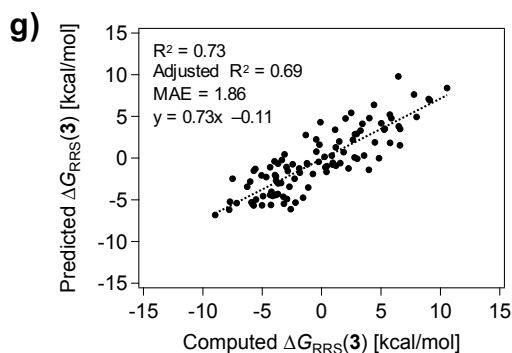

$$\Delta G_{RRS}(3) = -38.73 \epsilon_{HOMO,NCBG} + 79.98 l_{,NCBG} - 58.35 \eta_{,NCBG} - 39.78 X_{,NCBG} + 13.86 1/\omega_{NCBG} + 43.66 \epsilon_{HOMO,CBG} - 24.45 NBO(N)_{[M],CBG} + 6.32 NBO(N)_{[N-1],CBG} + 11.92 N_{k,CBG} + 7.97 \epsilon_{HOMO,BB} - 6.72 w_{L_{BB}} - 0.80 w_{B5_{BB}} + 12.70$$

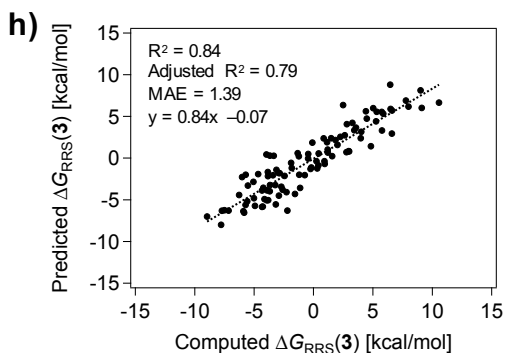

$$\Delta G_{RRS}(3) = -75.92 \epsilon_{HOMO,NCBG} + 12.06 \epsilon_{LUMO,NCBG} - 1.95 l_{,NCBG} + 170.08 A_{,NCBG} + 10.06 \eta_{,NCBG} - 51.35 S_{,NCBG} + 62.85 X_{,NCBG} - 95.39 \omega_{NCBG} + 119.38 1/\omega_{NCBG} - 1.79 \Delta G_{PEX,NCBG} - 160.56 \epsilon_{HOMO,CBG} - 1.89 \epsilon_{LUMO,CBG} - 29.64 NBO(N)_{[M],CBG} + 70.54 N_{,CBG} + 21.17 NBO(N)_{[N-1],CBG} + 14.34 f_{k^{-},CBG} + 4.98 N_{k,CBG} + 8.28 \Delta G_{ENF,CBG} + 8.11 \epsilon_{HOMO,BB} - 9.87 \epsilon_{LUMO,BB} - 12.88 w_{L_{BB}} + 7.12 w_{B1_{BB}} - 19.77 w_{B5_{BB}} - 89.95 v_{(N-H),BB} - 1.92 i_{(N-H),BB} - 9.78 NBO(N)_{[M],BB} - 268.91$$

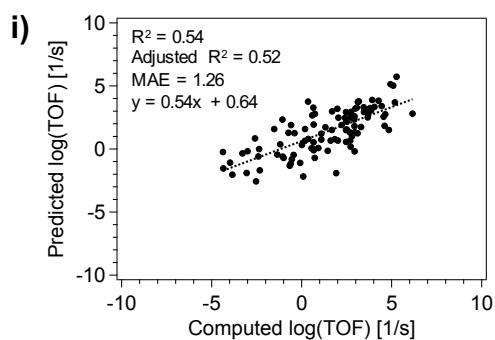

$$\log(\text{TOF}) = -2.95 \epsilon_{LUMO,NCBG} - 1.57 w_{L_{BB}} + 1.25 i_{(N-H),BB} - 4.91 \Delta G_{ENF,CBG} + 0.51 N_{k,CBG} + 6.15$$

**Figure S4.** Representative MLR models involving  $\Delta G_{RRS}(3)$  and the fragment parameters (continued). In model *i* the turnover frequency is parametrized.

**Table S6.** Training set.

| Catalyst | $\Delta G_{RRS}(3)$ | $\Delta G_{RRS}(3)$  |
|----------|---------------------|----------------------|
|          | computed [kcal/mol] | predicted [kcal/mol] |
| Cat2     | -5.1                | -3.3                 |
| Cat3     | -6.3                | -5.0                 |
| Cat5     | -7.5                | -4.9                 |
| Cat6     | -2.3                | -3.7                 |
| Cat8     | -5.9                | -8.5                 |
| Cat10    | -2.2                | -5.8                 |
| Cat13    | -4.9                | -3.8                 |
| Cat14    | -3.7                | -3.7                 |
| Cat15    | -3.9                | -3.8                 |
| Cat16    | -4.3                | -4.9                 |
| Cat17    | -2.6                | -4.9                 |
| Cat21    | -7.2                | -5.7                 |
| Cat23    | -0.2                | -1.1                 |
| Cat25    | 0.9                 | 1.2                  |
| Cat26    | -1.6                | -3.6                 |
| Cat27    | 1.9                 | 1.5                  |
| Cat28    | 0.3                 | -1.2                 |
| Cat29    | -1.8                | -0.8                 |
| Cat30    | -3.4                | -0.6                 |
| Cat32    | -0.1                | 0.8                  |
| Cat33    | 3.4                 | 1.7                  |
| Cat34    | -4.1                | -3.1                 |
| Cat36    | -2.7                | -3.5                 |
| Cat37    | 6.5                 | 6.3                  |
| Cat41    | 5.3                 | 3.2                  |
| Cat42    | -6.0                | 0.5                  |
| Cat43    | -1.3                | 0.5                  |
| Cat49    | 1.5                 | 2.0                  |
| Cat51    | 5.7                 | 4.1                  |
| Cat53    | -3.2                | -4.6                 |
| Cat54    | 0.4                 | 1.8                  |
| Cat55    | 4.5                 | 3.8                  |
| Cat58    | -2.9                | -0.3                 |
| Cat59    | -3.2                | -2.8                 |
| Cat62    | 3.3                 | 2.3                  |
| Cat63    | 0.9                 | 0.8                  |
| Cat65    | -1.9                | -1.3                 |
| Cat66    | -4.7                | -2.7                 |
| Cat67    | 3.6                 | 1.0                  |
| Cat71    | -3.7                | -2.1                 |
| Cat72    | 1.2                 | 2.7                  |
| Cat73    | 6.6                 | 3.2                  |
| Cat75    | 7.8                 | 8.3                  |
| Cat78    | 4.0                 | 3.7                  |
| Cat82    | 2.0                 | 1.3                  |
| Cat83    | 6.5                 | 5.9                  |
| Cat87    | 2.8                 | 3.0                  |
| Cat89    | -2.4                | -2.3                 |
| Cat93    | -3.1                | -2.7                 |
| Cat94    | 2.3                 | -0.1                 |
| Cat100   | -5.0                | -4.7                 |

**Table S7.** Validation set.

| Catalyst | $\Delta G_{RRS}(3)$ | $\Delta G_{RRS}(3)$  |
|----------|---------------------|----------------------|
|          | computed [kcal/mol] | predicted [kcal/mol] |
| Cat0     | -5.8                | -6.0                 |
| Cat1     | -7.8                | -7.7                 |
| Cat4     | -4.3                | -3.4                 |
| Cat7     | -3.9                | -4.6                 |
| Cat9     | -5.7                | -3.8                 |
| Cat11    | -5.7                | -5.4                 |
| Cat12    | -3.4                | -3.2                 |
| Cat18    | -2.9                | -4.1                 |
| Cat19    | -9.0                | -5.1                 |
| Cat20    | -4.3                | -4.8                 |
| Cat22    | -7.7                | -5.9                 |
| Cat24    | 2.6                 | 3.4                  |
| Cat31    | -5.5                | -3.3                 |
| Cat35    | -1.2                | -1.8                 |
| Cat38    | 5.3                 | 4.4                  |
| Cat39    | 9.1                 | 3.7                  |
| Cat40    | 0.4                 | -1.9                 |
| Cat44    | -1.2                | 0.3                  |
| Cat45    | 3.0                 | -1.4                 |
| Cat46    | 10.6                | 3.2                  |
| Cat47    | 0.2                 | -2.6                 |
| Cat48    | -3.9                | -2.4                 |
| Cat50    | 4.4                 | 6.9                  |
| Cat52    | 5.8                 | 3.4                  |
| Cat56    | 4.0                 | 2.4                  |
| Cat57    | 1.1                 | 0.0                  |
| Cat60    | -0.5                | 0.0                  |
| Cat61    | -3.8                | -4.2                 |
| Cat64    | -3.0                | -0.8                 |
| Cat68    | 6.6                 | 1.7                  |
| Cat69    | -4.0                | 0.7                  |
| Cat70    | -3.8                | -2.6                 |
| Cat74    | 4.8                 | 1.2                  |
| Cat76    | 0.9                 | -0.4                 |
| Cat77    | -0.4                | 0.3                  |
| Cat79    | 2.9                 | 0.7                  |
| Cat80    | -3.7                | -3.4                 |
| Cat81    | -5.6                | -2.6                 |
| Cat84    | 1.2                 | 1.1                  |
| Cat85    | 5.9                 | 4.9                  |
| Cat86    | -0.7                | -1.8                 |
| Cat88    | -1.1                | -2.4                 |
| Cat90    | 2.5                 | 5.5                  |
| Cat91    | 5.0                 | 3.5                  |
| Cat92    | -4.2                | -5.9                 |
| Cat95    | 2.8                 | -2.9                 |
| Cat96    | -0.3                | -2.7                 |
| Cat97    | 1.6                 | -0.4                 |
| Cat98    | 8.0                 | 2.2                  |
| Cat99    | 9.0                 | 7.9                  |

**Table S8.** NCBG–BB–CBG combinations for class 0 organocatalysts.

| Catalyst | NCBG | BB   | CBG  |
|----------|------|------|------|
| Cat0     | 0    | 0    | 0    |
| Cat1     | I    | 0    | 0    |
| Cat2     | II   | 0    | 0    |
| Cat3     | III  | 0    | 0    |
| Cat4     | IV   | 0    | 0    |
| Cat5     | V    | 0    | 0    |
| Cat6     | VI   | 0    | 0    |
| Cat7     | VII  | 0    | 0    |
| Cat8     | VIII | 0    | 0    |
| Cat9     | IX   | 0    | 0    |
| Cat10    | 0    | I    | 0    |
| Cat11    | 0    | II   | 0    |
| Cat12    | 0    | III  | 0    |
| Cat13    | 0    | IV   | 0    |
| Cat14    | 0    | V    | 0    |
| Cat15    | 0    | VI   | 0    |
| Cat16    | 0    | VII  | 0    |
| Cat17    | 0    | VIII | 0    |
| Cat18    | 0    | IX   | 0    |
| Cat19    | 0    | X    | 0    |
| Cat20    | 0    | 0    | I    |
| Cat21    | 0    | 0    | II   |
| Cat22    | 0    | 0    | III  |
| Cat23    | 0    | 0    | IV   |
| Cat24    | 0    | 0    | V    |
| Cat25    | 0    | 0    | VI   |
| Cat26    | 0    | 0    | VII  |
| Cat27    | 0    | 0    | VIII |
| Cat28    | 0    | 0    | IX   |
| Cat29    | 0    | 0    | X    |
| Cat30    | 0    | 0    | XI   |
| Cat31    | 0    | 0    | XII  |
| Cat32    | 0    | 0    | XIII |
| Cat33    | 0    | III  | IV   |
| Cat34    | I    | IV   | VII  |
| Cat35    | I    | VII  | IX   |
| Cat36    | III  | I    | I    |
| Cat37    | II   | V    | VI   |
| Cat38    | VI   | II   | VIII |
| Cat39    | III  | IX   | XIII |
| Cat40    | IV   | VIII | II   |
| Cat41    | VIII | VI   | V    |
| Cat42    | I    | X    | VI   |
| Cat43    | V    | 0    | XI   |
| Cat44    | VII  | IV   | XII  |
| Cat45    | IX   | V    | III  |
| Cat46    | IX   | I    | XIII |
| Cat47    | VIII | VII  | IX   |
| Cat48    | II   | II   | II   |
| Cat49    | III  | VI   | IX   |
| Cat50    | V    | V    | V    |
| Cat51    | VII  | VII  | VIII |
| Cat52    | VI   | IX   | X    |
| Cat53    | 0    | I    | I    |
| Cat54    | 0    | II   | VI   |
| Cat55    | 0    | V    | VIII |
| Cat56    | 0    | VIII | VI   |
| Cat57    | I    | III  | IV   |
| Cat58    | I    | IV   | X    |
| Cat59    | I    | VI   | XII  |
| Cat60    | I    | X    | XIII |
| Cat61    | I    | VII  | VII  |
| Cat62    | II   | I    | XI   |
| Cat63    | II   | III  | I    |
| Cat64    | II   | IV   | II   |
| Cat65    | II   | IX   | III  |
| Cat66    | II   | II   | 0    |
| Cat67    | III  | VIII | IX   |
| Cat68    | III  | IX   | IX   |
| Cat69    | III  | X    | IX   |
| Cat70    | III  | 0    | VII  |
| Cat71    | III  | III  | III  |

|        |      |      |      |
|--------|------|------|------|
| Cat72  | IV   | X    | X    |
| Cat73  | IV   | VIII | XI   |
| Cat74  | IV   | IX   | XII  |
| Cat75  | IV   | VI   | V    |
| Cat76  | IV   | II   | VII  |
| Cat77  | V    | III  | VII  |
| Cat78  | V    | VII  | VIII |
| Cat79  | V    | I    | XI   |
| Cat80  | V    | VIII | II   |
| Cat81  | V    | IV   | III  |
| Cat82  | VI   | I    | IV   |
| Cat83  | VI   | III  | XIII |
| Cat84  | VI   | VI   | XII  |
| Cat85  | VI   | VII  | VIII |
| Cat86  | VI   | IX   | 0    |
| Cat87  | VII  | V    | X    |
| Cat88  | VII  | X    | I    |
| Cat89  | VII  | VI   | III  |
| Cat90  | VII  | II   | V    |
| Cat91  | VII  | III  | X    |
| Cat92  | VIII | V    | II   |
| Cat93  | VIII | X    | IV   |
| Cat94  | VIII | VIII | VI   |
| Cat95  | VIII | I    | XI   |
| Cat96  | IX   | VII  | 0    |
| Cat97  | IX   | VI   | I    |
| Cat98  | IX   | VIII | IV   |
| Cat99  | IX   | IV   | V    |
| Cat100 | I    | II   | VII  |

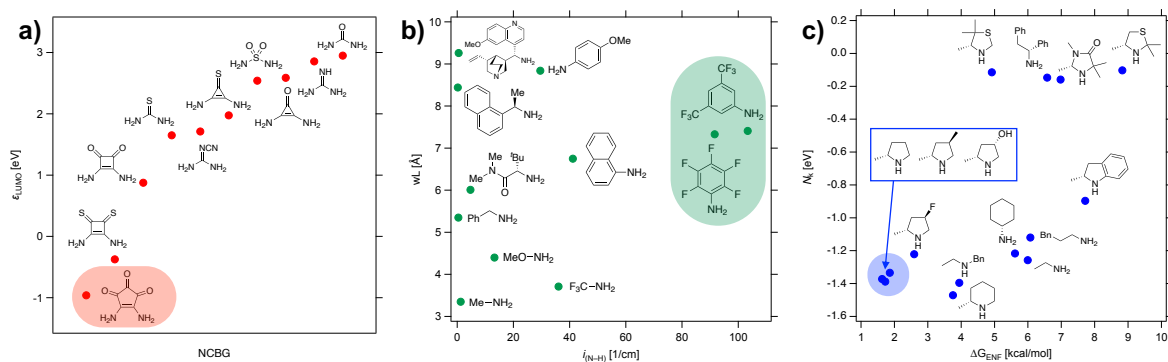

**Figure S5.** a) Comparison of NCBG fragments according to their  $\epsilon_{LUMO}$ . b) BBs analyzed according to their  $i_{(N-H)}$  (x-axis) and  $wL$  (y-axis) descriptor values. c) CBGs analyzed according to their  $\Delta G_{ENF}$  (x-axis) and  $N_k$  (y-axis) values. The fragments giving the lowest  $\Delta G_{RRS}$ (3) values, according to the MLR analysis, are highlighted.

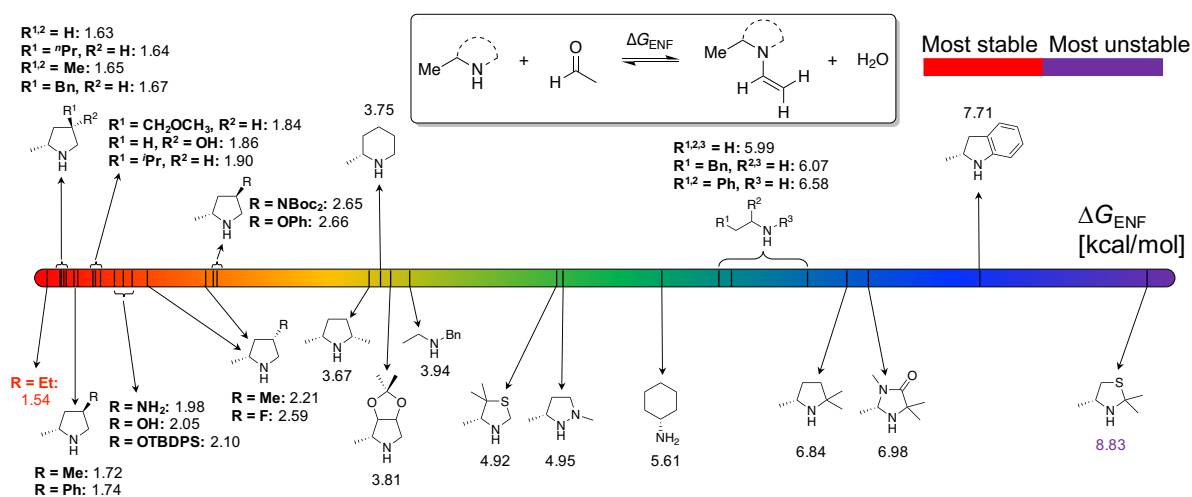

**Figure S6.**  $\Delta G_{ENF}$  values (kcal/mol) of all CBG fragments considered.

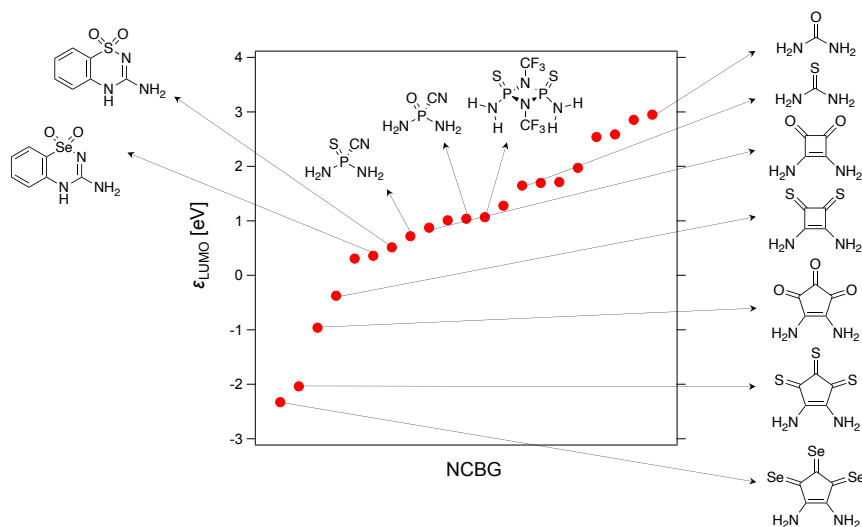

**Figure S7.**  $\epsilon_{LUMO}$  values (eV) of all NCBG fragments considered.

## 2. Structure of Class 0–2 Organocatalysts

Table S9. SMILES strings of class 0–2 organocatalysts.

| Catalyst | Class | SMILES                                                                                                   |
|----------|-------|----------------------------------------------------------------------------------------------------------|
| Cat0     | 0     | O=C1C(NC2=CC(C(F)F)=CC(C(F)F)F)=C2)=C(NC[C@H]3NCCC3)C1=O                                                 |
| Cat1     | 0     | S=C1C(NC2=CC(C(F)F)F)=CC(C(F)F)F)=C2)=C(NC[C@H]3NCCC3)C1=O                                               |
| Cat2     | 0     | O=C(NC[C@H]1NCCC1)NC2=CC(C(F)F)F)=CC(C(F)F)F)=C2                                                         |
| Cat3     | 0     | S=C(NC[C@H]1NCCC1)NC2=CC(C(F)F)F)=CC(C(F)F)F)=C2                                                         |
| Cat4     | 0     | N=C(NC[C@H]1NCCC1)NC2=CC(C(F)F)F)=CC(C(F)F)F)=C2                                                         |
| Cat5     | 0     | N#CN=C(NC[C@H]1NCCC1)NC2=CC(C(F)F)F)=CC(C(F)F)F)=C2                                                      |
| Cat6     | 0     | O=C1C(NC2=CC(C(F)F)F)=CC(C(F)F)F)=C2)=C1NC[C@H]3NCCC3                                                    |
| Cat7     | 0     | S=C1C(NC2=CC(C(F)F)F)=CC(C(F)F)F)=C2)=C1NC[C@H]3NCCC3                                                    |
| Cat8     | 0     | O=C(C(N[H])C1=CC(C(F)F)F)=CC(C(F)F)F)=C1)=C(N[H])C[C@H]2NCCC2)C3=O)C3=O                                  |
| Cat9     | 0     | O=S(NC1=CC(C(F)F)F)=CC(C(F)F)F)=C1)=NC[C@H]2NCCC2)O                                                      |
| Cat10    | 0     | O=C1C(NC[C@H]2NCCC2)=C(NC3=CC(C(F)F)F)=C(F)C(F)=C3)F)C1=O                                                |
| Cat11    | 0     | O=C1C(NC2=CC=C(OC)C=C2)=C(NC[C@H]3NCCC3)C1=O                                                             |
| Cat12    | 0     | O=C1C(NC)=C(NC[C@H]2NCCC2)C1=O                                                                           |
| Cat13    | 0     | O=C1C(NC(F)F)=C(NC[C@H]2NCCC2)C1=O                                                                       |
| Cat14    | 0     | O=C1C(NOC)=C(NC[C@H]2NCCC2)C1=O                                                                          |
| Cat15    | 0     | O=C1C(NC2=CC=CC=C2)=C(NC[C@H]3NCCC3)C1=O                                                                 |
| Cat16    | 0     | O=C1C(NC2=CC=CC3=C2C=CC=C3)=C(NC[C@H]4NCCC4)C1=O                                                         |
| Cat17    | 0     | O=C1C(NC[C@H]1)C2=C(C=CC=C3)C3=CC=C2)=C(NC[C@H]4NCCC4)C1=O                                               |
| Cat18    | 0     | O=C1C(NC[C@H]1(C)C(C)C(N)C)O)=C(NC[C@H]2NCCC2)C1=O                                                       |
| Cat19    | 0     | O=C1C(NC[C@H]1(C)C2=CC=NC3=C2C=C(OC)C=C3)[C@H]4[C@H]1(C)C5)[C@H]1(C)C=C)C[N@]5C4)=C(NC[C@H]6NCCC6)C1=O   |
| Cat20    | 0     | O=C1C(NC2=CC(C(F)F)F)=CC(C(F)F)F)=C2)=C(NC[C@H]3NCC3)C1=O                                                |
| Cat21    | 0     | O=C1C(NC2=CC(C(F)F)F)=CC(C(F)F)F)=C2)=C(NC[C@H]3NCC(C)C)C1=O                                             |
| Cat22    | 0     | O=C1C(NC2=CC(C(F)F)F)=CC(C(F)F)F)=C2)=C(NC[C@H]3NCC(C)C)C1=O                                             |
| Cat23    | 0     | O=C1C(NC2=CC(C(F)F)F)=CC(C(F)F)F)=C2)=C(NC[C@H]3NCC(C)C)C1=O                                             |
| Cat24    | 0     | O=C1C(NC2=CC(C(F)F)F)=CC(C(F)F)F)=C2)=C(NC[C@H]3NCC(C)C)C1=O                                             |
| Cat25    | 0     | O=C1C(NC2=CC(C(F)F)F)=CC(C(F)F)F)=C2)=C(NC[C@H]3NCC(C)C)C1=O                                             |
| Cat26    | 0     | O=C1C(NC2=CC(C(F)F)F)=CC(C(F)F)F)=C2)=C(NC[C@H]3NCCC3)C1=O                                               |
| Cat27    | 0     | O=C1C(NC2=CC(C(F)F)F)=CC(C(F)F)F)=C2)=C(NC[C@H]3NCC(C)C)C1=O                                             |
| Cat28    | 0     | O=C1C(NC2=CC(C(F)F)F)=CC(C(F)F)F)=C2)=C(NC[C@H]3NCCC3)C1=O                                               |
| Cat29    | 0     | O=C1C(NC2=CC(C(F)F)F)=CC(C(F)F)F)=C2)=C(NCCN)C1=O                                                        |
| Cat30    | 0     | O=C1C(NC2=CC(C(F)F)F)=CC(C(F)F)F)=C2)=C(NC[C@H]1)C3=CC=CC=C3)C1=O                                        |
| Cat31    | 0     | O=C1C(NC2=CC(C(F)F)F)=CC(C(F)F)F)=C2)=C(NCCNCC3=CC=CC=C3)C1=O                                            |
| Cat32    | 0     | O=C1C(NC2=CC(C(F)F)F)=CC(C(F)F)F)=C2)=C(NC[C@H]1)C3=CC=CC=C3)[C@H]1(C)C4=CC=CC=C4)N)C1=O                 |
| Cat33    | 0     | O=C1C(NC)=C(NC[C@H]2NCCC2)C1=O                                                                           |
| Cat34    | 0     | S=C1C(NC(F)F)=C(NC[C@H]2NCCC2)C1=S                                                                       |
| Cat35    | 0     | S=C1C(NC2=CC=CC3=C2C=CC=C3)=C(NC[C@H]4C@H]1(N)CCCC4)C1=S                                                 |
| Cat36    | 0     | S=C(NC[C@H]1NCC1)C(C)C(N)C)O)=C(NC[C@H]2NCCC2)C1=O                                                       |
| Cat37    | 0     | O=C(NC[C@H]1NCC1)C(C)C(N)C)O)=C(NC[C@H]2NCCC2)C1=O                                                       |
| Cat38    | 0     | O=C1C(NC2=CC=C(OC)C=C2)=C1NC[C@H]3NCC(C)C)C1=O                                                           |
| Cat39    | 0     | S=C(NC[C@H]1(C)C(C)C(N)C)O)=C(NC[C@H]2NCCC2)C1=O                                                         |
| Cat40    | 0     | N=C(NC[C@H]1NCC1)C(C)C(N)C)O)=C(NC[C@H]2NCCC2)C1=O                                                       |
| Cat41    | 0     | O=C(C(N[H])C1=CC=CC=C1)=C(N[H])C[C@H]2NCC(C)C)C3=O)C3=O                                                  |
| Cat42    | 0     | S=C1C(NC[C@H]1(C)C2=CC=NC3=C2C=C(OC)C=C3)[C@H]4[C@H]1(C)C5)[C@H]1(C)C=C)C[N@]5C4)=C(NC[C@H]6NCC(C)C)C1=O |
| Cat43    | 0     | NC[C@H]1(C)C1=CC=CC=C1)NC(NC2=CC(C(F)F)F)=CC(C(F)F)F)=C2)=NC#N                                           |
| Cat44    | 0     | S=C1C(NC(F)F)=C1NCCNCC2=CC=CC=C2                                                                         |
| Cat45    | 0     | O=S(NOC)N(C)C[C@H]1NCC1)C1=O                                                                             |
| Cat46    | 0     | O=S(NC1=C(F)F)=C1F)C(F)=C1F)N(C)C[C@H]1(C)C2=CC=CC=C2)N)C3=CC=CC=C3)O)C4=O                               |
| Cat47    | 0     | O=C(NC[C@H]1NCC1)C(C)C(N)C)O)=C(NC[C@H]2NCCC2)C1=O                                                       |
| Cat48    | 0     | O=C(NC[C@H]1NCC1)C(C)C(N)C)O)=C(NC[C@H]2NCCC2)C1=O                                                       |
| Cat49    | 0     | S=C(NC[C@H]1NCC1)C(C)C(N)C)O)=C(NC[C@H]2NCCC2)C1=O                                                       |
| Cat50    | 0     | N#CN=C(NC1NCC1)C(C)C(N)C)O)=C(NC[C@H]2NCCC2)C1=O                                                         |
| Cat51    | 0     | S=C1C(NC2=CC=CC3=C2C=CC=C3)=C1NC[C@H]4NCC(C)C)C1=O                                                       |
| Cat52    | 0     | O=C1C(NC[C@H]1(C)C(C)C(N)C)O)=C1NCCN                                                                     |
| Cat53    | 0     | O=C1C(NC[C@H]2NCC(C)C)C2)=C(NC3=C(F)F)=C(F)C(F)=C3)C1=O                                                  |
| Cat54    | 0     | O=C1C(NC2=CC=C(OC)C=C2)=C(NC[C@H]3NCC(C)C)C1=O                                                           |
| Cat55    | 0     | O=C1C(NC[C@H]2NCC(C)C)C2)=C(NOC)C1=O                                                                     |
| Cat56    | 0     | O=C1C(NC[C@H]1(C)C(C)C(N)C)O)=C(NC[C@H]2NCC(C)C)C1=O                                                     |
| Cat57    | 0     | S=C1C(NC)=C(NC[C@H]2NCCC2)C1=S                                                                           |
| Cat58    | 0     | S=C1C(NC(F)F)=C(NCCN)C1=S                                                                                |
| Cat59    | 0     | S=C1C(NC2=CC=CC=C2)=C(NCCNCC3=CC=CC=C3)C1=S                                                              |
| Cat60    | 0     | S=C1C(NC[C@H]1(C)C2=CC=NC3=C2C=C(OC)C=C3)[C@H]4[C@H]1(C)C5)[C@H]1(C)C=C)C[N@]5C4)=C(NC[C@H]6NCC(C)C)C1=O |
| Cat61    | 0     | S=C1C(NC2=CC=CC3=C2C=CC=C3)=C(NC[C@H]4NCCC4)C1=S                                                         |
| Cat62    | 0     | O=C(NC[C@H]1(C)C1=CC=CC=C1)NC(NC2=CC(C(F)F)F)=CC(C(F)F)F)=C2)F                                           |
| Cat63    | 0     | O=C(NC[C@H]1NCC1)C(C)C(N)C)O)=C(NC[C@H]2NCCC2)C1=O                                                       |
| Cat64    | 0     | O=C(NC[C@H]1NCC1)C(C)C(N)C)O)=C(NC[C@H]2NCCC2)C1=O                                                       |
| Cat65    | 0     | O=C(NC[C@H]1NCC1)C(C)C(N)C)O)=C(NC[C@H]2NCCC2)C1=O                                                       |
| Cat66    | 0     | O=C(NC[C@H]1NCCC1)NC2=CC=C(OC)C=C2                                                                       |
| Cat67    | 0     | S=C(NC[C@H]1NCC1)C(C)C(N)C)O)=C(NC[C@H]2NCCC2)C1=O                                                       |
| Cat68    | 0     | S=C(NC[C@H]1NCC1)C(C)C(N)C)O)=C(NC[C@H]2NCCC2)C1=O                                                       |
| Cat69    | 0     | S=C(NC[C@H]1NCC1)C(C)C(N)C)O)=C(NC[C@H]2NCCC2)C1=O                                                       |
| Cat70    | 0     | S=C(NC[C@H]1NCC1)NC2=CC(C(F)F)F)=CC(C(F)F)F)=C2                                                          |
| Cat71    | 0     | S=C(NC[C@H]1NCC1)C(C)C(N)C)O)=C(NC[C@H]2NCCC2)C1=O                                                       |
| Cat72    | 0     | N=C(NCCN)N(C)C[C@H]1(C)C2=CC=C(OC)C=C2)[C@H]3[C@H]1(C)C4)[C@H]1(C)C=C)C[N@]4C3                           |
| Cat73    | 0     | N=C(NC[C@H]1(C)C1=CC=CC=C1)NC(NC[C@H]1(C)C2=C(C=CC=C3)C3=CC=C2)                                          |
| Cat74    | 0     | N=C(NCCNCC1=CC=CC=C1)NC(C)C(N)C)O)=C(NC[C@H]2NCCC2)C1=O                                                  |
| Cat75    | 0     | N=C(NC[C@H]1NCC1)C(C)C(N)C)O)=C(NC[C@H]2NCCC2)C1=O                                                       |
| Cat76    | 0     | N=C(NC[C@H]1NCCC1)NC2=CC=C(OC)C=C2                                                                       |
| Cat77    | 0     | N#CN=C(NC[C@H]1NCCC1)NC                                                                                  |
| Cat78    | 0     | N#CN=C(NC[C@H]1NCC1)C(C)C(N)C)O)=C2C1)NC3=CC=CC4=C3C=CC=C4                                               |
| Cat79    | 0     | FC1=C(F)C(F)=C(F)C(NC[N]C@H]1(C)C2=CC=CC=C2)CN=N)C1=O                                                    |
| Cat80    | 0     | O[C@H]1(C)C1NCC1)C(C)C(N)C)O)=C(NC[C@H]2NCCC2)C1=O                                                       |
| Cat81    | 0     | N#CN=C(NC[C@H]1NCC1)C(C)C(N)C)O)=C(NC[C@H]2NCCC2)C1=O                                                    |
| Cat82    | 0     | O=C1C(NC2=C(F)F)=C(F)C(F)=C2F)=C1NC[C@H]3NCC3)C1=O                                                       |
| Cat83    | 0     | O=C1C(NC)=C1N[C@H]1(C)C2=CC=CC=C2)[C@H]1(C)C3=CC=CC=C3)N                                                 |
| Cat84    | 0     | O=C1C(NC2=CC=CC=C2)=C1NCCNCC3=CC=CC=C3                                                                   |
| Cat85    | 0     | O=C1C(NC2=CC=CC3=C2C=CC=C3)=C1NC[C@H]4NCC(C)C)C1=O                                                       |
| Cat86    | 0     | O=C1C(NC[C@H]1(C)C(C)C(N)C)O)=C1NC[C@H]2NCCC2                                                            |
| Cat87    | 0     | S=C1C(NOC)=C1NCCN                                                                                        |
| Cat88    | 0     | S=C1C(NC[C@H]1(C)C2=CC=NC3=C2C=C(OC)C=C3)[C@H]4[C@H]1(C)C5)[C@H]1(C)C=C)C[N@]5C4)=C(NC[C@H]6NCC(C)C)C1=O |
| Cat89    | 0     | S=C1C(NCC2=CC=CC=C2)=C1NC[C@H]3NCC(C)C)C1=O                                                              |
| Cat90    | 0     | S=C1C(NC2=CC=C(OC)C=C2)=C1NC[C@H]3NCC(C)C)C1=O                                                           |
| Cat91    | 0     | S=C1C(NC)=C1NCCN                                                                                         |
| Cat92    | 0     | O=C(C(N[H])C1=CC=CC=C1)=C(N[H])C[C@H]2NCC(C)C)C3=O)C3=O                                                  |
| Cat93    | 0     | O=C(C(N[H])C1=CC=CC=C1)=C(N[H])C[C@H]2NCC(C)C)C3=O)C3=O                                                  |
| Cat94    | 0     | O=C(C(N[H])C1=CC=CC=C1)=C(N[H])C[C@H]2NCC(C)C)C3=O)C3=O                                                  |
| Cat95    | 0     | O=C(C(N[H])C1=CC=CC=C1)=C(N[H])C[C@H]2NCC(C)C)C3=O)C3=O                                                  |
| Cat96    | 0     | O=S(NC1=CC=CC=C1)NC(C)C(N)C)O)=C(NC[C@H]3NCCC3)C1=O                                                      |
| Cat97    | 0     | O=S(NCC1=CC=CC=C1)NC(C)C(N)C)O)=C(NC[C@H]3NCCC3)C1=O                                                     |
| Cat98    | 0     | O=S(NC[C@H]1(C)C1=CC=CC=C1)NC(C)C(N)C)O)=C(NC[C@H]3NCCC3)C1=O                                            |
| Cat99    | 0     | O=S(NC(F)F)N(C)C[C@H]1NCC1)C1=O                                                                          |
| Cat100   | 0     | S=C1C(NC2=CC=C(OC)C=C2)=C(NC[C@H]3NCCC3)C1=O                                                             |
| Cat101   | 1     | O=C(C(N[H])C1=CC(C(F)F)F)=CC(C(F)F)F)=C1)=C(N[H])C[C@H]2NCC(C)C)C3=O)C3=O                                |
| Cat102   | 1     | O=C(C(N[H])C1=CC(C(F)F)F)=CC(C(F)F)F)=C1)=C(N[H])C[C@H]2NCC(C)C)C3=O)C3=O                                |
| Cat103   | 1     | O=C(C(N[H])C1=CC(C(F)F)F)=CC(C(F)F)F)=C1)=C(N[H])C[C@H]2NCC(C)C)C3=O)C3=O                                |
| Cat104   | 1     | O=C(C(N[H])C1=CC(C(F)F)F)=CC(C(F)F)F)=C1)=C(N[H])C[C@H]2NCC(C)C)C3=O)C3=O                                |
| Cat105   | 1     | O=C(C(N[H])C1=CC(C(F)F)F)=CC(C(F)F)F)=C1)=C(N[H])C[C@H]2NCC(C)C)C3=O)C3=O                                |
| Cat106   | 1     | O=C(C(N[H])C1=CC(C(F)F)F)=CC(C(F)F)F)=C1)=C(N[H])C[C@H]2NCC(C)C)C3=O)C3=O                                |
| Cat122   | 2     | O=P([N]C[C@H]1NCCC1)C(N)NC2=CC(C(F)F)F)=CC(C(F)F)F)=C2                                                   |
| Cat123   | 2     | F[B-]1(F)C(C=CC=C2)=C2NC(NC[C@H]3NCCC3)=O+1                                                              |
| Cat124   | 2     | O=C1C(C=CC=C2)=C2NC(NC[C@H]3NCCC3)=N1                                                                    |
| Cat125   | 2     | O=S1(C)C=CC=C2)=C2NC(NC[C@H]3NCCC3)=N1=O                                                                 |
| Cat126   | 2     | FC1=C(C(F)F)F)=C2=C1NC(NC[C@H]3NCCC3)=N2)F)F                                                             |

|        |   |                                                                                           |
|--------|---|-------------------------------------------------------------------------------------------|
| Cat131 | 2 | S=[P@](NC[C@H]1NCCC1)(C#N)NC2=CC(C(F)F)F=CC(C(F)F)F=C2                                    |
| Cat132 | 2 | S=[P@@](N1C(C)C(C)N(C2=CC(C(F)F)F)=CC(C(F)F)F=C2)[H]N(C)C(C)C[P@@]1(N([H])C[C@H]3NCCC3)=S |
| Cat133 | 2 | F[B-]1(F)C(C)C(F)F=CC(C(F)F)F=C2=C2NC(NC[C@H]3NCCC3)=[O+]                                 |
| Cat134 | 2 | O=C1C(C(F)F)F=CC(C(F)F)F=C2=C2NC(NC[C@H]3NCCC3)=N1                                        |
| Cat135 | 2 | O=S1C(C)C(F)F=CC(C(F)F)F=C2=C2NC(NC[C@H]3NCCC3)=N1=O                                      |
| Cat136 | 2 | FC1=CC(C(F)F)F=CC(N2)=C1N=C2NC[C@H]3NCCC3(F)F                                             |
| Cat139 | 2 | S=[P@@](N1C(F)F)N(C2=CC(C(F)F)F)=CC(C(F)F)F=C2)[H]N(C(F)F)F[P@@]1(N([H])C[C@H]3NCCC3)=S   |
| Cat141 | 2 | O=S1C(C)C(F)F=CC(C(F)F)F=C2=C2NC(NC[C@H]3NC[C@H](C)C3)=N1=O                               |
| Cat142 | 2 | O=S1C(C)C(F)F=CC(C(F)F)F=C2=C2NC(NC[C@H]3NC[C@H](CC)C3)=N1=O                              |
| Cat101 | 2 | S=C(CN([H])C1=CC(C(F)F)F=CC(C(F)F)F=C1)=C(N([H])C[C@H]2NCC2)C3=S)C3=S                     |
| Cat107 | 2 | S=C(CN([H])C1=CC(C(F)F)F=CC(C(F)F)F=C1)=C(N([H])C[C@H]2NC[C@H](O)C2)C3=S)C3=S             |
| Cat108 | 2 | S=C(CN([H])C1=CC(C(F)F)F=CC(C(F)F)F=C1)=C(N([H])C[C@H]2NC[C@H](C)C2)C3=S)C3=S             |
| Cat109 | 2 | S=C(CN([H])C1=CC(C(F)F)F=CC(C(F)F)F=C1)=C(N([H])C[C@H]2NC(C)C2)C3=S)C3=S                  |
| Cat110 | 2 | S=C(CN([H])C1=CC(C(F)F)F=CC(C(F)F)F=C1)=C(N([H])C[C@H]2NCC2)C3=S)C3=S                     |
| Cat111 | 2 | S=C(CN([H])C1=CC(C(F)F)F=CC(C(F)F)F=C1)=C(N([H])C[C@H]2NC[C@H](O)C2)C3=S)C3=S             |
| Cat112 | 2 | S=C(CN([H])C1=CC(C(F)F)F=CC(C(F)F)F=C1)=C(N([H])C[C@H]2NC[C@H](C)C2)C3=S)C3=S             |
| Cat113 | 2 | S=C(CN([H])C1=CC(C(F)F)F=CC(C(F)F)F=C1)=C(N([H])C[C@H]2NC(C)C2)C3=S)C3=S                  |
| Cat114 | 2 | S=C(CN([H])C1=CC=C(C(F)F)F=C1)=C(N([H])C[C@H]2NCC2)C3=S)C3=S                              |
| Cat115 | 2 | S=C(CN([H])C1=CC=C(C(F)F)F=C1)=C(N([H])C[C@H]2NC[C@H](O)C2)C3=S)C3=S                      |
| Cat116 | 2 | S=C(CN([H])C1=CC=C(C(F)F)F=C1)=C(N([H])C[C@H]2NC[C@H](C)C2)C3=S)C3=S                      |
| Cat117 | 2 | S=C(CN([H])C1=CC=C(C(F)F)F=C1)=C(N([H])C[C@H]2NCC(C)C2)C3=S)C3=S                          |
| Cat118 | 2 | S=C(CN([H])C1=C(F)F)F=C(C(F)F)F)F=C1F)=C(N([H])C[C@H]2NCC2)C3=S)C3=S                      |
| Cat119 | 2 | S=C(CN([H])C1=C(F)F)F=C(C(F)F)F)F=C1F)=C(N([H])C[C@H]2NC[C@H](O)C2)C3=S)C3=S              |
| Cat120 | 2 | S=C(CN([H])C1=C(F)F)F=C(C(F)F)F)F=C1F)=C(N([H])C[C@H]2NC[C@H](C)C2)C3=S)C3=S              |
| Cat121 | 2 | S=C(CN([H])C1=C(F)F)F=C(C(F)F)F)F=C1F)=C(N([H])C[C@H]2NCC(C)C2)C3=S)C3=S                  |
| Cat127 | 2 | S=C(CN([H])C1=CC(C(F)F)F=CC(C(F)F)F=C1)=C(N([H])C[C@H]2NC[C@H](CC)C2)C3=S)C3=S            |
| Cat128 | 2 | S=C(CN([H])C1=CC(C(F)F)F=CC(C(F)F)F=C1)=C(N([H])C[C@H]2NC[C@H](CC)C2)C3=S)C3=S            |
| Cat129 | 2 | S=C(CN([H])C1=CC(C(F)F)F=CC(C(F)F)F=C1)=C(N([H])C[C@H]2NC[C@H](CC)C2)C3=S)C3=S            |
| Cat130 | 2 | S=C(CN([H])C1=CC(C(F)F)F=CC(C(F)F)F=C1)=C(N([H])C[C@H]2NC[C@H](CC)C2)C3=S)C3=S            |
| Cat137 | 2 | [Se]=C(CN([H])C1=CC(C(F)F)F=CC(C(F)F)F=C1)=C(N([H])C[C@H]2NCC2)C3=[Se])C3=[Se]            |
| Cat138 | 2 | [Se]=C(CN([H])C1=CC(C(F)F)F=CC(C(F)F)F=C1)=C(N([H])C[C@H]2NC[C@H](C)C2)C3=[Se])C3=[Se]    |
| Cat140 | 2 | [Se]=C(CN([H])C1=CC(C(F)F)F=CC(C(F)F)F=C1)=C(N([H])C[C@H]2NC[C@H](CC)C2)C3=[Se])C3=[Se]   |
| Cat143 | 2 | O=[Se]1(C)C(C(F)F)F=CC(C(F)F)F=C2=C2NC(NC[C@H]3NCCC3)=N1=O                                |
| Cat144 | 2 | O=[Se]1(C)C(C(F)F)F=CC(C(F)F)F=C2=C2NC(NC[C@H]3NC[C@H](C)C3)=N1=O                         |
| Cat145 | 2 | O=[Se]1(C)C(C(F)F)F=CC(C(F)F)F=C2=C2NC(NC[C@H]3NC[C@H](CC)C3)=N1=O                        |

### Class 1:

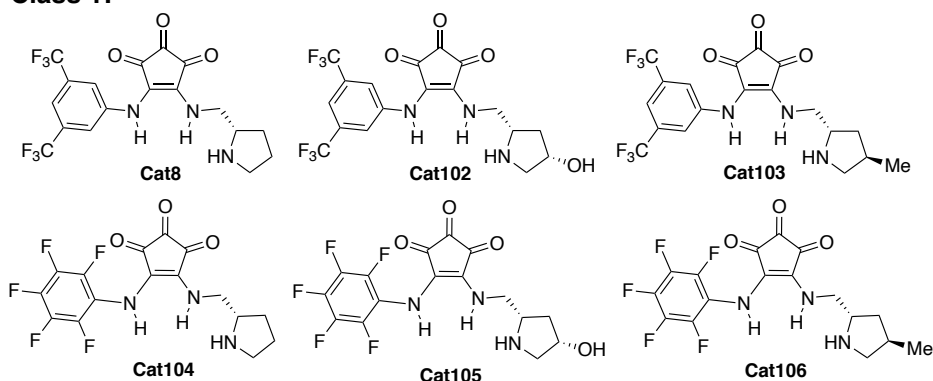

### Class 2:

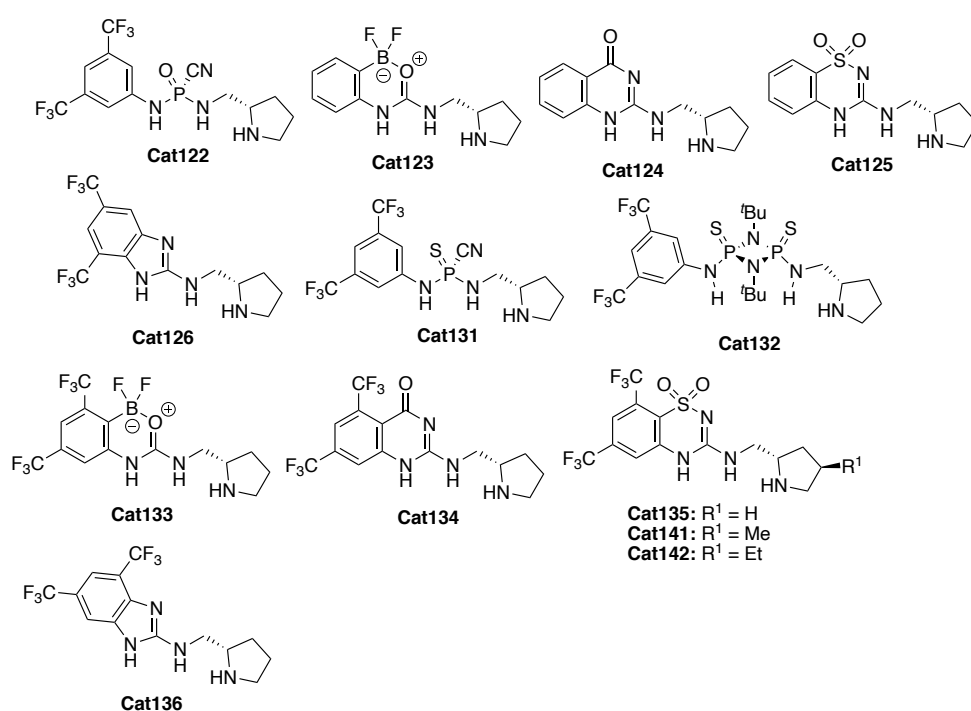

Figure S8. Structure of class 1–2 organocatalysts.



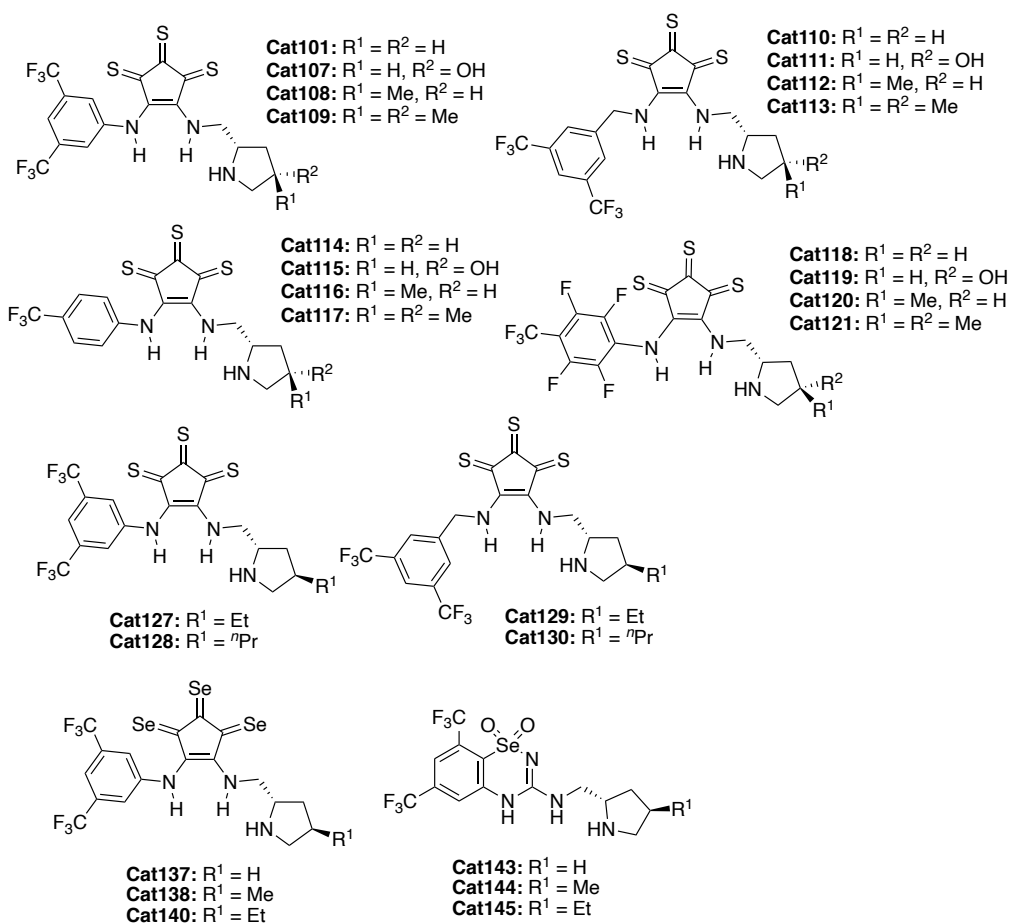

**Figure S9.** Structure of class 2 organocatalysts (continued).

### 3. Comparison of Potential Energy Surfaces

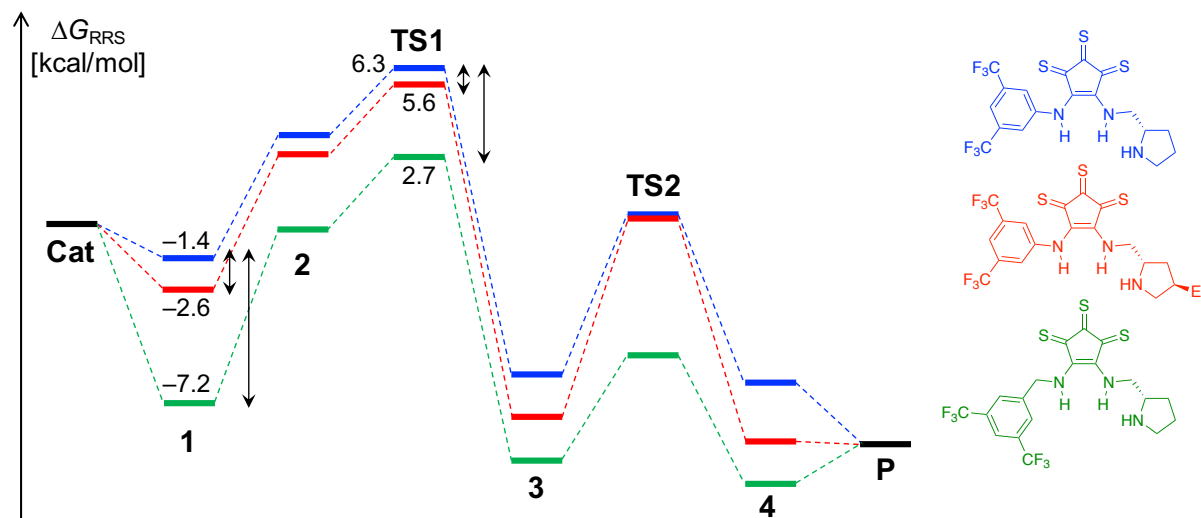

**Figure S10.** Comparison of PES of organocatalysts **Cat101** (blue), **Cat127** (red), and **Cat110** (green), showing the adverse effect of fragments that over-stabilized intermediate **1**. Although better molecular building blocks help stabilize **TS1** (TDTS), if **1** (TDI) is more significantly stabilized, the energy span increases *i.e.*, the catalyst becomes less active.

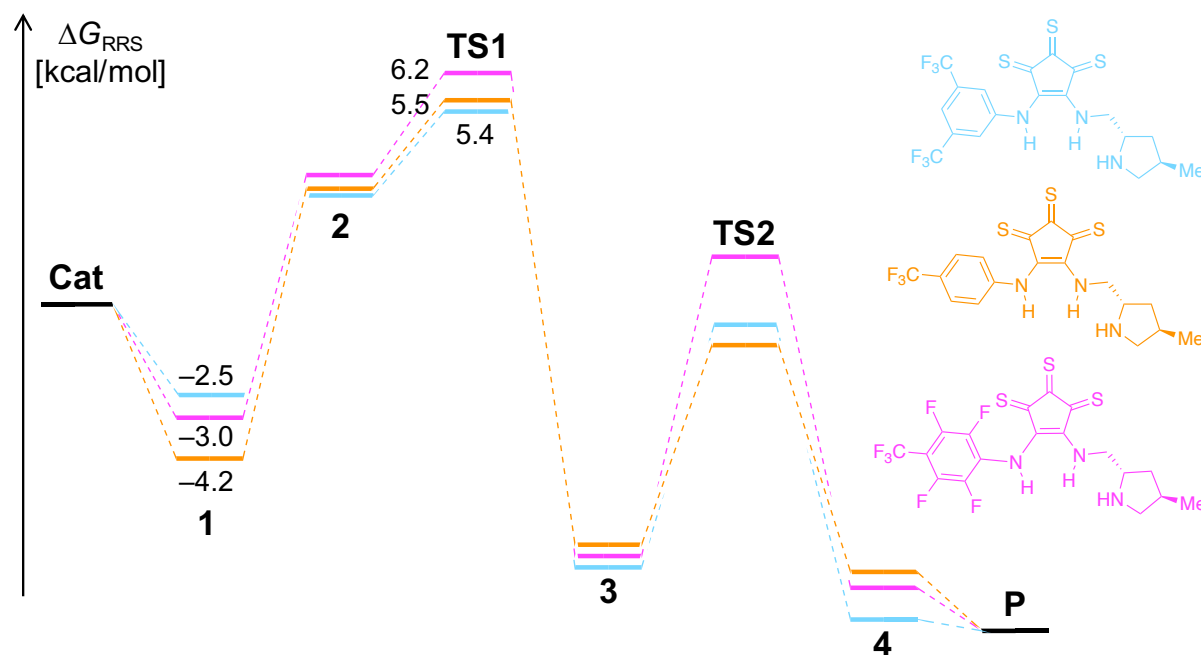

**Figure S11.** Comparison of PES of organocatalysts **Cat108** (light blue), **Cat116** (orange), and **Cat120** (pink).

## 4. Enantioselectivity Prediction of Selected Class 0 Organocatalysts

Despite this work being focused on activity-based screening, the enantioselectivity of 32 organocatalysts from class 0 was estimated. These catalysts are variations of Jørgensen's original pyrrolidine/squaramide catalyst (*i.e.*, one NCBG/BB/CBG unit is kept constant, and the other two are systematically varied). Based on the low-energy pathway leading to the (*S,S*)-product (the enantiomer of the product considered in the present study) identified by Wheeler and co-workers,<sup>9</sup> **TS1-(*S*)** of catalysts **0–32** was located and optimized using AARON.<sup>10</sup> Table S10 reports the relative quasi-harmonic Gibbs free energies of **TS1-(*R*)**/**TS1-(*S*)**, along with the predicted % (*R,R*)-product. In all cases, **TS1-(*R*)** lies significantly higher in energy than **TS1-(*S*)**. The free energy differences are consistent with the experimentally reported high enantioselectivity (in the case of **Cat0**).<sup>11</sup> However, as noted by Wheeler *et al.*,<sup>9</sup> the computed enantioselectivity is overestimated compared to the experimental one (**Cat0** = *er* 99.0 : 1.0). Indeed, significantly high  $\Delta\Delta G^\ddagger$  ( $\gg 2$  kcal/mol) values were obtained.

**Table S10.** Relative Gibbs free energies of **TS1** leading to the (*R,R*)- or to the (*S,S*)-product for selected class 0 organocatalysts. % (*R,R*)-product =  $100 \times \exp(\Delta\Delta G^\ddagger/RT) / [1 + \exp(\Delta\Delta G^\ddagger/RT)]$ .

|              | <b>TS1-(<i>R</i>)</b> | <b>TS1-(<i>S</i>)</b> | $\Delta\Delta G^\ddagger$ | % ( <i>R,R</i> )-product |
|--------------|-----------------------|-----------------------|---------------------------|--------------------------|
| <b>Cat0</b>  | 9.9                   | 12.9                  | 3.0                       | 99.3                     |
| <b>Cat1</b>  | 8.3                   | 11.8                  | 3.5                       | 99.7                     |
| <b>Cat2</b>  | 9.0                   | 16.8                  | 7.8                       | 100.0                    |
| <b>Cat3</b>  | 8.6                   | 15.7                  | 7.0                       | 100.0                    |
| <b>Cat4</b>  | 9.3                   | 16.7                  | 7.4                       | 100.0                    |
| <b>Cat5</b>  | 7.2                   | 14.6                  | 7.3                       | 100.0                    |
| <b>Cat6</b>  | 9.6                   | 17.4                  | 7.9                       | 100.0                    |
| <b>Cat7</b>  | 8.1                   | 18.7                  | 10.6                      | 100.0                    |
| <b>Cat8</b>  | 7.5                   | 13.4                  | 5.9                       | 100.0                    |
| <b>Cat9</b>  | 11.9                  | 19.4                  | 7.5                       | 100.0                    |
| <b>Cat10</b> | 11.5                  | 14.8                  | 3.4                       | 99.7                     |
| <b>Cat11</b> | 8.1                   | 12.7                  | 4.6                       | 100.0                    |
| <b>Cat12</b> | 9.4                   | 14.9                  | 5.5                       | 100.0                    |
| <b>Cat13</b> | 8.9                   | 13.8                  | 5.0                       | 100.0                    |
| <b>Cat14</b> | 9.8                   | 15.8                  | 6.0                       | 100.0                    |
| <b>Cat15</b> | 9.0                   | 12.4                  | 3.4                       | 99.7                     |
| <b>Cat16</b> | 9.1                   | 14.6                  | 5.4                       | 100.0                    |
| <b>Cat17</b> | 10.3                  | 14.0                  | 3.7                       | 99.8                     |
| <b>Cat18</b> | 10.9                  | 16.3                  | 5.3                       | 100.0                    |
| <b>Cat19</b> | 6.0                   | 13.8                  | 7.8                       | 100.0                    |
| <b>Cat20</b> | 9.6                   | 13.8                  | 4.2                       | 99.9                     |
| <b>Cat21</b> | 8.5                   | 11.9                  | 3.4                       | 99.7                     |
| <b>Cat22</b> | 8.3                   | 11.4                  | 3.1                       | 99.5                     |
| <b>Cat23</b> | 13.3                  | 17.1                  | 3.8                       | 99.8                     |
| <b>Cat24</b> | 17.5                  | 24.0                  | 6.5                       | 100.0                    |
| <b>Cat25</b> | 13.5                  | 20.2                  | 6.7                       | 100.0                    |
| <b>Cat26</b> | 14.4                  | 22.5                  | 8.1                       | 100.0                    |
| <b>Cat28</b> | 15.1                  | 20.1                  | 5.0                       | 100.0                    |
| <b>Cat29</b> | 12.1                  | 16.6                  | 4.5                       | 100.0                    |
| <b>Cat30</b> | 11.3                  | 17.3                  | 6.0                       | 100.0                    |
| <b>Cat31</b> | 9.1                   | 14.1                  | 5.0                       | 100.0                    |
| <b>Cat32</b> | 14.1                  | 19.1                  | 5.0                       | 100.0                    |

## 5. Computed Electronic Energies and Gibbs Free Energies

**Table S11.** Single-point electronic energies, quasi-harmonic enthalpies, and Gibbs free energies (298 K) of substrates and (*R,R*)-product at the PCM/ $\omega$ B97X-D/Def2-TZVP//B97-D/Def2-SVP/PCM level, in Hartree.

| Compound     | E_SPC        | qh-H_SPC     | qh-G(T)_SPC  |
|--------------|--------------|--------------|--------------|
| Anthracene   | -692.159666  | -691.920762  | -691.973502  |
| Nitrostyrene | -514.174552  | -514.031911  | -514.076676  |
| Product      | -1206.377928 | -1205.993396 | -1206.064176 |
| Water        | -76.443735   | -76.419150   | -76.440608   |

**Table S12.** Single-point electronic energies, quasi-harmonic enthalpies, and Gibbs free energies (298 K) of Cat at the PCM/ $\omega$ B97X-D/Def2-TZVP//B97-D/Def2-SVP/PCM level, in Hartree.

| Catalyst | E_SPC        | qh-H_SPC     | qh-G(T)_SPC  |
|----------|--------------|--------------|--------------|
| Cat0     | -1570.763709 | -1570.436923 | -1570.518470 |
| Cat1     | -2216.679976 | -2216.356620 | -2216.438905 |
| Cat2     | -1381.271652 | -1380.967397 | -1381.041716 |
| Cat3     | -1704.219410 | -1703.917509 | -1703.992466 |
| Cat4     | -1361.368237 | -1361.051689 | -1361.125871 |
| Cat5     | -1453.610917 | -1453.294355 | -1453.372371 |
| Cat6     | -1457.387483 | -1457.072073 | -1457.150195 |
| Cat7     | -1780.359814 | -1780.045934 | -1780.124735 |
| Cat8     | -1684.103690 | -1683.765582 | -1683.849383 |
| Cat9     | -1816.548646 | -1816.243792 | -1816.321099 |
| Cat10    | -1392.789191 | -1392.513122 | -1392.587144 |
| Cat11    | -1011.088978 | -1010.742837 | -1010.812553 |
| Cat12    | -704.818906  | -704.560424  | -704.618269  |
| Cat13    | -1002.607899 | -1002.371353 | -1002.433914 |
| Cat14    | -779.979233  | -779.717183  | -779.777691  |
| Cat15    | -935.870595  | -935.529109  | -935.596245  |
| Cat16    | -1050.189926 | -1049.829511 | -1049.898934 |
| Cat17    | -1128.826162 | -1128.408087 | -1128.484013 |
| Cat18    | -1109.429986 | -1108.972051 | -1109.052656 |
| Cat19    | -1625.611332 | -1624.989874 | -1625.085543 |
| Cat20    | -1670.022868 | -1669.702645 | -1669.785271 |
| Cat21    | -1645.993309 | -1645.660721 | -1645.743710 |
| Cat22    | -1610.081204 | -1609.725617 | -1609.808888 |
| Cat23    | -2008.285011 | -2007.927301 | -2008.014002 |
| Cat24    | -2008.288601 | -2007.931349 | -2008.018386 |
| Cat25    | -1778.806199 | -1778.422662 | -1778.513809 |
| Cat26    | -1610.085300 | -1609.729163 | -1609.812605 |
| Cat27    | -1723.190638 | -1722.839042 | -1722.924400 |
| Cat28    | -1610.099959 | -1609.743598 | -1609.825907 |
| Cat29    | -1454.028366 | -1453.765375 | -1453.841272 |
| Cat30    | -1724.396495 | -1724.021868 | -1724.109708 |
| Cat31    | -1724.383786 | -1724.010384 | -1724.097070 |
| Cat32    | -1916.126510 | -1915.698265 | -1915.793111 |
| Cat33    | -1142.340585 | -1142.051031 | -1142.115300 |
| Cat34    | -1687.841391 | -1687.578897 | -1687.644426 |
| Cat35    | -1735.442482 | -1735.055568 | -1735.128110 |
| Cat36    | -1625.503019 | -1625.258874 | -1625.328572 |
| Cat37    | -798.531051  | -798.234763  | -798.297863  |
| Cat38    | -1050.140141 | -1049.780710 | -1049.851414 |
| Cat39    | -1588.247948 | -1587.713015 | -1587.801717 |
| Cat40    | -994.657221  | -994.244103  | -994.314311  |
| Cat41    | -1486.741258 | -1486.357331 | -1486.431353 |
| Cat42    | -2479.575704 | -2478.899789 | -2479.004155 |
| Cat43    | -1607.239957 | -1606.875539 | -1606.960661 |
| Cat44    | -1365.821683 | -1365.551280 | -1365.619221 |
| Cat45    | -1065.089330 | -1064.820638 | -1064.879346 |
| Cat46    | -1983.947913 | -1983.591898 | -1983.674596 |
| Cat47    | -1202.864816 | -1202.462969 | -1202.536332 |
| Cat48    | -896.824632  | -896.495776  | -896.560784  |
| Cat49    | -1108.662115 | -1108.315676 | -1108.377899 |
| Cat50    | -1100.353839 | -1100.070432 | -1100.132198 |
| Cat51    | -1412.211213 | -1411.839010 | -1411.910893 |
| Cat52    | -879.312183  | -878.929914  | -879.002242  |

|        |              |              |              |
|--------|--------------|--------------|--------------|
| Cat53  | -1492.042927 | -1491.774141 | -1491.850060 |
| Cat54  | -1219.131620 | -1218.728773 | -1218.808116 |
| Cat55  | -932.406325  | -932.119175  | -932.183841  |
| Cat56  | -1336.869615 | -1336.394616 | -1336.479455 |
| Cat57  | -1788.262711 | -1787.976236 | -1788.041542 |
| Cat58  | -1531.787176 | -1531.618641 | -1531.676139 |
| Cat59  | -1735.412364 | -1735.027087 | -1735.103854 |
| Cat60  | -2616.892440 | -2616.173111 | -2616.284026 |
| Cat61  | -1735.428833 | -1735.042392 | -1735.115045 |
| Cat62  | -1356.934536 | -1356.633207 | -1356.706944 |
| Cat63  | -614.580806  | -614.352912  | -614.405742  |
| Cat64  | -888.347877  | -888.128557  | -888.186365  |
| Cat65  | -959.248828  | -958.784615  | -958.859954  |
| Cat66  | -821.593979  | -821.270713  | -821.333541  |
| Cat67  | -1301.622940 | -1301.199490 | -1301.269279 |
| Cat68  | -1282.221477 | -1281.758162 | -1281.833403 |
| Cat69  | -1798.403346 | -1797.775472 | -1797.864010 |
| Cat70  | -1743.538471 | -1743.206804 | -1743.282473 |
| Cat71  | -877.597075  | -877.335377  | -877.390183  |
| Cat72  | -1299.479161 | -1298.931272 | -1299.014027 |
| Cat73  | -1073.061907 | -1072.606281 | -1072.681184 |
| Cat74  | -1053.653373 | -1053.157339 | -1053.235939 |
| Cat75  | -1163.995081 | -1163.633570 | -1163.699943 |
| Cat76  | -841.009805  | -840.644894  | -840.709391  |
| Cat77  | -626.990789  | -626.713278  | -626.769495  |
| Cat78  | -1085.468717 | -1085.093641 | -1085.164104 |
| Cat79  | -1429.272655 | -1428.958835 | -1429.036292 |
| Cat80  | -1086.906792 | -1086.493169 | -1086.567313 |
| Cat81  | -924.775889  | -924.521574  | -924.584115  |
| Cat82  | -1716.930970 | -1716.635286 | -1716.712555 |
| Cat83  | -936.805304  | -936.457528  | -936.527138  |
| Cat84  | -976.109773  | -975.732916  | -975.804571  |
| Cat85  | -1089.238430 | -1088.864614 | -1088.935721 |
| Cat86  | -996.045052  | -995.598757  | -995.676037  |
| Cat87  | -872.837870  | -872.652768  | -872.705819  |
| Cat88  | -1934.458042 | -1933.857217 | -1933.952377 |
| Cat89  | -1184.781610 | -1184.425089 | -1184.493179 |
| Cat90  | -1658.208733 | -1657.845726 | -1657.916724 |
| Cat91  | -797.678930  | -797.498097  | -797.549609  |
| Cat92  | -968.551760  | -968.272516  | -968.337883  |
| Cat93  | -2176.476692 | -2175.811660 | -2175.913755 |
| Cat94  | -1450.213579 | -1449.726862 | -1449.813339 |
| Cat95  | -1659.764313 | -1659.429143 | -1659.512365 |
| Cat96  | -1295.979979 | -1295.641671 | -1295.706940 |
| Cat97  | -1280.911246 | -1280.598741 | -1280.662444 |
| Cat98  | -1812.137513 | -1811.709963 | -1811.785861 |
| Cat99  | -1685.920181 | -1685.674767 | -1685.738314 |
| Cat100 | -1696.325969 | -1695.953802 | -1696.026396 |
| Cat101 | -2652.977398 | -2652.645124 | -2652.731420 |
| Cat102 | -1759.333242 | -1758.989543 | -1759.075480 |
| Cat103 | -1723.421192 | -1723.054551 | -1723.141002 |
| Cat104 | -1506.132041 | -1505.844482 | -1505.921569 |
| Cat105 | -1581.361529 | -1581.068454 | -1581.147943 |
| Cat106 | -1545.449530 | -1545.133319 | -1545.212814 |
| Cat107 | -2728.207828 | -2727.869950 | -2727.957847 |
| Cat108 | -2692.295051 | -2691.934454 | -2692.023538 |
| Cat109 | -2731.613709 | -2731.225127 | -2731.314091 |
| Cat110 | -2692.293990 | -2691.930975 | -2692.016881 |
| Cat111 | -2767.524113 | -2767.156292 | -2767.245073 |
| Cat112 | -2731.620568 | -2731.230051 | -2731.318476 |
| Cat113 | -2770.933214 | -2770.513421 | -2770.604131 |
| Cat114 | -2315.874782 | -2315.549736 | -2315.627501 |
| Cat115 | -2391.105785 | -2390.775782 | -2390.853923 |
| Cat116 | -2355.192972 | -2354.839448 | -2354.919744 |
| Cat117 | -2394.509083 | -2394.126876 | -2394.210150 |
| Cat118 | -2712.857677 | -2712.561807 | -2712.646538 |
| Cat119 | -2788.088863 | -2787.787385 | -2787.874131 |
| Cat120 | -2752.175920 | -2751.851681 | -2751.939067 |
| Cat121 | -2791.492047 | -2791.139029 | -2791.229525 |
| Cat122 | -1777.409251 | -1777.099598 | -1777.180640 |
| Cat123 | -931.201621  | -930.909386  | -930.971216  |
| Cat124 | -799.329121  | -799.037810  | -799.097051  |
| Cat125 | -1234.623689 | -1234.331207 | -1234.393005 |
| Cat126 | -1360.179826 | -1359.885668 | -1359.957591 |
| Cat127 | -2731.611207 | -2731.222039 | -2731.313727 |

|        |              |              |              |
|--------|--------------|--------------|--------------|
| Cat128 | -2770.927487 | -2770.509869 | -2770.604724 |
| Cat129 | -2770.932731 | -2770.514428 | -2770.603859 |
| Cat130 | -2810.252636 | -2809.805194 | -2809.897626 |
| Cat131 | -2100.362624 | -2100.053932 | -2100.134438 |
| Cat132 | -3172.431489 | -3171.866431 | -3171.973913 |
| Cat133 | -1605.407923 | -1605.101073 | -1605.178343 |
| Cat134 | -1473.524617 | -1473.218973 | -1473.293868 |
| Cat135 | -1908.818193 | -1908.511693 | -1908.589837 |
| Cat136 | -1360.180959 | -1359.886629 | -1359.957836 |
| Cat137 | -8663.207851 | -8662.877600 | -8662.966871 |
| Cat138 | -8702.525774 | -8702.167251 | -8702.259844 |
| Cat139 | -3532.085727 | -3531.735074 | -3531.835419 |
| Cat140 | -8741.841749 | -8741.454455 | -8741.549401 |
| Cat141 | -1948.136531 | -1947.801127 | -1947.881148 |
| Cat142 | -1987.452630 | -1987.088599 | -1987.171901 |
| Cat143 | -3912.148414 | -3911.844127 | -3911.924131 |
| Cat144 | -3951.466714 | -3951.134136 | -3951.216862 |
| Cat145 | -3990.782812 | -3990.421542 | -3990.507092 |

**Table S13.** Single-point electronic energies, quasi-harmonic enthalpies, and Gibbs free energies (298 K) of intermediate **1** at the PCM/ $\omega$ B97X-D/Def2-TZVP//B97-D/Def2-SVP/PCM level, in Hartree.

| Catalyst | E_SPC        | qh-H_SPC     | qh-G(T)_SPC  |
|----------|--------------|--------------|--------------|
| Cat0     | -2186.494995 | -2185.953655 | -2186.054889 |
| Cat1     | -2832.411032 | -2831.873094 | -2831.975640 |
| Cat2     | -1997.005937 | -1996.487284 | -1996.581742 |
| Cat3     | -2319.953668 | -2319.437071 | -2319.531612 |
| Cat4     | -1977.102911 | -1976.572217 | -1976.666991 |
| Cat5     | -2069.346496 | -2068.815431 | -2068.913202 |
| Cat6     | -2073.120503 | -2072.590990 | -2072.690243 |
| Cat7     | -2396.093533 | -2395.565572 | -2395.664555 |
| Cat8     | -2299.836343 | -2299.283420 | -2299.386758 |
| Cat9     | -2432.278989 | -2431.760358 | -2431.857517 |
| Cat10    | -2008.524242 | -2008.033784 | -2008.128876 |
| Cat11    | -1626.818002 | -1626.257956 | -1626.350166 |
| Cat12    | -1320.546279 | -1320.073977 | -1320.155200 |
| Cat13    | -1618.334202 | -1617.883980 | -1617.969297 |
| Cat14    | -1395.706779 | -1395.230909 | -1395.315335 |
| Cat15    | -1551.603954 | -1551.049226 | -1551.138993 |
| Cat16    | -1665.919251 | -1665.344821 | -1665.436854 |
| Cat17    | -1744.558655 | -1743.926452 | -1744.023102 |
| Cat18    | -1725.159894 | -1724.487171 | -1724.588493 |
| Cat19    | -2241.347888 | -2240.512642 | -2240.630364 |
| Cat20    | -2285.752501 | -2285.218291 | -2285.321128 |
| Cat21    | -2261.728337 | -2261.181369 | -2261.284098 |
| Cat22    | -2225.813446 | -2225.243532 | -2225.347146 |
| Cat23    | -2624.013993 | -2623.442153 | -2623.549135 |
| Cat24    | -2624.012089 | -2623.440212 | -2623.547020 |
| Cat25    | -2394.532040 | -2393.934774 | -2394.046249 |
| Cat26    | -2225.818441 | -2225.247075 | -2225.349142 |
| Cat27    | -2338.918167 | -2338.351560 | -2338.456848 |
| Cat28    | -2225.828552 | -2225.257671 | -2225.359713 |
| Cat29    | -2069.758367 | -2069.281107 | -2069.377411 |
| Cat30    | -2340.127581 | -2339.538539 | -2339.646946 |
| Cat31    | -2340.121413 | -2339.531124 | -2339.636940 |
| Cat32    | -2531.852203 | -2531.209897 | -2531.325573 |
| Cat33    | -1758.065327 | -1757.562573 | -1757.649418 |
| Cat34    | -2303.569939 | -2303.093433 | -2303.181459 |
| Cat35    | -2351.177344 | -2350.576646 | -2350.670870 |
| Cat36    | -2241.233448 | -2240.774694 | -2240.865478 |
| Cat37    | -1414.247934 | -1413.738549 | -1413.825215 |
| Cat38    | -1665.864603 | -1665.291411 | -1665.384650 |
| Cat39    | -2203.971926 | -2203.223110 | -2203.333666 |
| Cat40    | -1610.391968 | -1609.765335 | -1609.857557 |
| Cat41    | -2102.458679 | -2101.860387 | -2101.957717 |
| Cat42    | -3095.304485 | -3094.416456 | -3094.544909 |
| Cat43    | -2222.970870 | -2222.392375 | -2222.497285 |
| Cat44    | -1981.552683 | -1981.068628 | -1981.158328 |
| Cat45    | -1680.810217 | -1680.328327 | -1680.412503 |
| Cat46    | -2599.663154 | -2599.094191 | -2599.201269 |
| Cat47    | -1818.589477 | -1817.973754 | -1818.069887 |
| Cat48    | -1512.556434 | -1512.013682 | -1512.101191 |
| Cat49    | -1724.388962 | -1723.828739 | -1723.914064 |

|        |              |              |              |
|--------|--------------|--------------|--------------|
| Cat50  | -1716.072078 | -1715.575750 | -1715.661899 |
| Cat51  | -2027.940708 | -2027.354584 | -2027.448584 |
| Cat52  | -1495.037431 | -1494.441204 | -1494.536235 |
| Cat53  | -2107.779279 | -2107.295861 | -2107.392601 |
| Cat54  | -1834.856024 | -1834.239574 | -1834.341273 |
| Cat55  | -1548.129288 | -1547.628858 | -1547.716827 |
| Cat56  | -1952.594061 | -1951.905730 | -1952.013215 |
| Cat57  | -2403.986602 | -2403.486870 | -2403.575076 |
| Cat58  | -2147.510320 | -2147.127256 | -2147.208735 |
| Cat59  | -2351.144229 | -2350.545002 | -2350.643057 |
| Cat60  | -3232.620040 | -3231.686149 | -3231.817279 |
| Cat61  | -2351.157729 | -2350.556220 | -2350.650236 |
| Cat62  | -1972.659314 | -1972.143353 | -1972.237815 |
| Cat63  | -1230.307297 | -1229.864841 | -1229.941157 |
| Cat64  | -1504.073358 | -1503.639898 | -1503.719684 |
| Cat65  | -1574.982639 | -1574.304401 | -1574.401865 |
| Cat66  | -1437.325949 | -1436.788623 | -1436.874139 |
| Cat67  | -1917.349842 | -1916.712353 | -1916.804363 |
| Cat68  | -1897.945049 | -1897.267851 | -1897.365651 |
| Cat69  | -2414.139693 | -2413.298580 | -2413.410169 |
| Cat70  | -2359.275350 | -2358.728840 | -2358.824506 |
| Cat71  | -1493.324080 | -1492.848770 | -1492.927265 |
| Cat72  | -1915.215303 | -1914.454272 | -1914.559734 |
| Cat73  | -1688.790926 | -1688.121688 | -1688.218392 |
| Cat74  | -1669.383387 | -1668.674209 | -1668.775354 |
| Cat75  | -1779.720493 | -1779.145261 | -1779.233752 |
| Cat76  | -1456.743036 | -1456.163443 | -1456.249888 |
| Cat77  | -1242.719906 | -1242.227820 | -1242.307177 |
| Cat78  | -1701.194860 | -1700.606069 | -1700.699224 |
| Cat79  | -2044.997871 | -2044.470128 | -2044.569072 |
| Cat80  | -1702.642052 | -1702.014564 | -1702.109852 |
| Cat81  | -1540.500634 | -1540.032656 | -1540.115087 |
| Cat82  | -2332.659853 | -2332.150615 | -2332.248474 |
| Cat83  | -1552.528912 | -1551.967152 | -1552.059464 |
| Cat84  | -1591.839296 | -1591.249038 | -1591.343568 |
| Cat85  | -1704.967156 | -1704.379540 | -1704.472729 |
| Cat86  | -1611.775924 | -1611.115497 | -1611.214543 |
| Cat87  | -1488.559766 | -1488.161032 | -1488.238150 |
| Cat88  | -2550.196320 | -2549.380357 | -2549.496220 |
| Cat89  | -1800.508758 | -1799.938483 | -1800.029904 |
| Cat90  | -2273.933595 | -2273.356344 | -2273.451905 |
| Cat91  | -1413.402332 | -1413.007036 | -1413.080815 |
| Cat92  | -1584.280579 | -1583.787539 | -1583.875814 |
| Cat93  | -2792.205126 | -2791.327712 | -2791.453740 |
| Cat94  | -2065.936859 | -2065.236539 | -2065.346106 |
| Cat95  | -2275.493312 | -2274.943421 | -2275.048157 |
| Cat96  | -1911.713128 | -1911.160710 | -1911.248185 |
| Cat97  | -1896.640965 | -1896.115655 | -1896.203880 |
| Cat98  | -2427.858671 | -2427.218658 | -2427.315384 |
| Cat99  | -2301.630837 | -2301.172290 | -2301.259963 |
| Cat100 | -2312.061652 | -2311.475224 | -2311.569607 |
| Cat101 | -3268.708183 | -3268.160947 | -3268.266492 |
| Cat102 | -2375.067023 | -2374.509311 | -2374.615022 |
| Cat103 | -2339.154526 | -2338.573516 | -2338.679771 |
| Cat104 | -2121.866550 | -2121.364849 | -2121.463664 |
| Cat105 | -2197.095535 | -2196.587962 | -2196.687588 |
| Cat106 | -2161.183137 | -2160.652510 | -2160.752759 |
| Cat107 | -3343.941377 | -3343.389476 | -3343.497245 |
| Cat108 | -3308.026712 | -3307.451611 | -3307.560423 |
| Cat109 | -3347.344977 | -3346.741992 | -3346.852924 |
| Cat110 | -3308.028454 | -3307.452024 | -3307.561206 |
| Cat111 | -3383.259208 | -3382.677204 | -3382.788464 |
| Cat112 | -3347.346146 | -3346.741549 | -3346.854058 |
| Cat113 | -3386.663047 | -3386.030298 | -3386.142672 |
| Cat114 | -2931.606583 | -2931.066652 | -2931.165484 |
| Cat115 | -3006.837290 | -3006.292174 | -3006.392955 |
| Cat116 | -2970.924847 | -2970.357027 | -2970.459256 |
| Cat117 | -3010.242235 | -3009.646670 | -3009.751259 |
| Cat118 | -3328.592300 | -3328.081401 | -3328.186886 |
| Cat119 | -3403.823285 | -3403.307148 | -3403.414292 |
| Cat120 | -3367.908135 | -3367.368873 | -3367.476752 |
| Cat121 | -3407.226548 | -3406.659243 | -3406.769381 |
| Cat122 | -2393.141605 | -2392.617538 | -2392.718400 |
| Cat123 | -1546.926135 | -1546.419813 | -1546.504940 |
| Cat124 | -1415.060028 | -1414.554214 | -1414.634874 |

|        |              |              |              |
|--------|--------------|--------------|--------------|
| Cat125 | -1850.353601 | -1849.846499 | -1849.929784 |
| Cat126 | -1975.911213 | -1975.402621 | -1975.495477 |
| Cat127 | -3347.343021 | -3346.739303 | -3346.850712 |
| Cat128 | -3386.659356 | -3386.026912 | -3386.141108 |
| Cat129 | -3386.663289 | -3386.030209 | -3386.145812 |
| Cat130 | -3425.979690 | -3425.317895 | -3425.435576 |
| Cat131 | -2716.091955 | -2715.569440 | -2715.671272 |
| Cat132 | -3788.171942 | -3787.392780 | -3787.520098 |
| Cat133 | -2221.139482 | -2220.617723 | -2220.715382 |
| Cat134 | -2089.259527 | -2088.739054 | -2088.833559 |
| Cat135 | -2524.549300 | -2524.027338 | -2524.124772 |
| Cat136 | -1975.913779 | -1975.405383 | -1975.497398 |
| Cat137 | -9278.939248 | -9278.394089 | -9278.503367 |
| Cat138 | -9318.257263 | -9317.683871 | -9317.795613 |
| Cat139 | -4147.826033 | -4147.260271 | -4147.381425 |
| Cat140 | -9357.573968 | -9356.972041 | -9357.086116 |
| Cat141 | -2563.867560 | -2563.317497 | -2563.417879 |
| Cat142 | -2603.184012 | -2602.605417 | -2602.708691 |
| Cat143 | -4527.879980 | -4527.361037 | -4527.460891 |
| Cat144 | -4567.198273 | -4566.651082 | -4566.753793 |
| Cat145 | -4606.514788 | -4605.938610 | -4606.043552 |

**Table S14.** Single-point electronic energies, quasi-harmonic enthalpies, and Gibbs free energies (298 K) of intermediate **2** at the PCM/ $\omega$ B97X-D/Def2-TZVP//B97-D/Def2-SVP/PCM level, in Hartree.

| Catalyst | E SPC        | qh-H SPC     | qh-G(T) SPC  |
|----------|--------------|--------------|--------------|
| Cat0     | -2700.686621 | -2700.001846 | -2700.123360 |
| Cat1     | -3346.600963 | -3345.919629 | -3346.042483 |
| Cat2     | -2511.194349 | -2510.531984 | -2510.647137 |
| Cat3     | -2834.140209 | -2833.480391 | -2833.597080 |
| Cat4     | -2491.291103 | -2490.616633 | -2490.731871 |
| Cat5     | -2583.534069 | -2582.859895 | -2582.979409 |
| Cat6     | -2587.309883 | -2586.637290 | -2586.757498 |
| Cat7     | -2910.282567 | -2909.611444 | -2909.732473 |
| Cat8     | -2814.025420 | -2813.329297 | -2813.454087 |
| Cat9     | -2946.468099 | -2945.805150 | -2945.921918 |
| Cat10    | -2522.711351 | -2522.077205 | -2522.193056 |
| Cat11    | -2141.011156 | -2140.307697 | -2140.419963 |
| Cat12    | -1834.737463 | -1834.121701 | -1834.223560 |
| Cat13    | -2132.527217 | -2131.933548 | -2132.038674 |
| Cat14    | -1909.897766 | -1909.278538 | -1909.382889 |
| Cat15    | -2065.790801 | -2065.092628 | -2065.200969 |
| Cat16    | -2180.110102 | -2179.392361 | -2179.505086 |
| Cat17    | -2258.750734 | -2257.975215 | -2258.092605 |
| Cat18    | -2239.356732 | -2238.540434 | -2238.662127 |
| Cat19    | -2755.540587 | -2754.561370 | -2754.698513 |
| Cat20    | -2799.944539 | -2799.267438 | -2799.391690 |
| Cat21    | -2775.917118 | -2775.227323 | -2775.351313 |
| Cat22    | -2740.004723 | -2739.292045 | -2739.416849 |
| Cat23    | -3138.201320 | -3137.486536 | -3137.613969 |
| Cat24    | -3138.200564 | -3137.485762 | -3137.613352 |
| Cat25    | -2908.721712 | -2907.980863 | -2908.112501 |
| Cat26    | -2740.000753 | -2739.286679 | -2739.409864 |
| Cat27    | -2853.108562 | -2852.399196 | -2852.525540 |
| Cat28    | -2740.013222 | -2739.299255 | -2739.422605 |
| Cat29    | -2583.944748 | -2583.324473 | -2583.441447 |
| Cat30    | -2854.315249 | -2853.581729 | -2853.709267 |
| Cat31    | -2854.305247 | -2853.573746 | -2853.702284 |
| Cat32    | -3046.041502 | -3045.255454 | -3045.390660 |
| Cat33    | -2272.252318 | -2271.606230 | -2271.714019 |
| Cat34    | -2817.755664 | -2817.136217 | -2817.244648 |
| Cat35    | -2865.356398 | -2864.612531 | -2864.728103 |
| Cat36    | -2755.422211 | -2754.820269 | -2754.932436 |
| Cat37    | -1928.439356 | -1927.785999 | -1927.893352 |
| Cat38    | -2180.059094 | -2179.342123 | -2179.455992 |
| Cat39    | -2718.153316 | -2717.261869 | -2717.393515 |
| Cat40    | -2124.577283 | -2123.806679 | -2123.920443 |
| Cat41    | -2616.645020 | -2615.904204 | -2616.022884 |
| Cat42    | -3609.498068 | -3608.466464 | -3608.615222 |
| Cat43    | -2737.154208 | -2736.432994 | -2736.559754 |
| Cat44    | -2495.739661 | -2495.112237 | -2495.223953 |
| Cat45    | -2194.994631 | -2194.368660 | -2194.471316 |
| Cat46    | -3113.852169 | -3113.139550 | -3113.265860 |



|        |              |              |              |
|--------|--------------|--------------|--------------|
| Cat47  | -2332.776856 | -2332.017841 | -2332.134491 |
| Cat48  | -2026.746017 | -2026.059687 | -2026.167847 |
| Cat49  | -2238.573353 | -2237.869761 | -2237.975916 |
| Cat50  | -2230.259289 | -2229.619690 | -2229.726291 |
| Cat51  | -2542.127802 | -2541.397365 | -2541.511932 |
| Cat52  | -2009.233101 | -2008.493230 | -2008.608004 |
| Cat53  | -2621.969072 | -2621.342021 | -2621.459512 |
| Cat54  | -2349.046175 | -2348.286403 | -2348.408841 |
| Cat55  | -2062.318906 | -2061.674539 | -2061.782882 |
| Cat56  | -2466.783030 | -2465.950930 | -2466.079002 |
| Cat57  | -2918.174466 | -2917.531476 | -2917.640383 |
| Cat58  | -2661.701240 | -2661.175323 | -2661.277407 |
| Cat59  | -2865.330276 | -2864.587947 | -2864.707595 |
| Cat60  | -3746.812348 | -3745.735215 | -3745.886903 |
| Cat61  | -2865.343039 | -2864.599402 | -2864.715265 |
| Cat62  | -2486.844153 | -2486.185752 | -2486.302540 |
| Cat63  | -1744.497455 | -1743.911592 | -1744.008894 |
| Cat64  | -2018.266942 | -2017.690062 | -2017.790485 |
| Cat65  | -2089.169171 | -2088.347287 | -2088.465537 |
| Cat66  | -1951.515228 | -1950.834182 | -1950.940024 |
| Cat67  | -2431.532715 | -2430.752306 | -2430.866246 |
| Cat68  | -2412.129437 | -2411.308214 | -2411.425756 |
| Cat69  | -2928.322079 | -2927.338298 | -2927.471746 |
| Cat70  | -2873.454773 | -2872.765470 | -2872.883643 |
| Cat71  | -2007.515716 | -2006.896686 | -2006.995604 |
| Cat72  | -2429.398179 | -2428.493709 | -2428.619873 |
| Cat73  | -2202.978098 | -2202.165332 | -2202.283177 |
| Cat74  | -2183.563924 | -2182.711321 | -2182.835529 |
| Cat75  | -2293.901109 | -2293.182868 | -2293.293222 |
| Cat76  | -1970.921907 | -1970.199529 | -1970.307659 |
| Cat77  | -1756.901862 | -1756.266995 | -1756.367540 |
| Cat78  | -2215.382275 | -2214.649976 | -2214.763974 |
| Cat79  | -2559.180861 | -2558.510217 | -2558.630710 |
| Cat80  | -2216.832761 | -2216.062260 | -2216.178488 |
| Cat81  | -2054.695159 | -2054.083461 | -2054.188239 |
| Cat82  | -2846.850763 | -2846.197991 | -2846.317459 |
| Cat83  | -2066.715922 | -2066.011566 | -2066.125829 |
| Cat84  | -2106.028095 | -2105.294516 | -2105.411130 |
| Cat85  | -2219.156813 | -2218.424883 | -2218.538507 |
| Cat86  | -2125.974046 | -2125.170095 | -2125.289379 |
| Cat87  | -2002.749839 | -2002.207586 | -2002.305062 |
| Cat88  | -3064.387458 | -3063.428336 | -3063.565231 |
| Cat89  | -2314.701901 | -2313.988277 | -2314.100295 |
| Cat90  | -2788.123766 | -2787.403190 | -2787.519339 |
| Cat91  | -1927.589964 | -1927.051954 | -1927.148303 |
| Cat92  | -2098.468766 | -2097.832409 | -2097.940680 |
| Cat93  | -3306.394352 | -3305.372579 | -3305.517126 |
| Cat94  | -2580.127354 | -2579.283501 | -2579.413703 |
| Cat95  | -2789.676975 | -2788.984130 | -2789.110111 |
| Cat96  | -2425.890432 | -2425.194563 | -2425.302939 |
| Cat97  | -2410.820016 | -2410.150762 | -2410.258743 |
| Cat98  | -2942.039701 | -2941.255809 | -2941.375509 |
| Cat99  | -2815.814868 | -2815.212956 | -2815.319863 |
| Cat100 | -2826.241964 | -2825.512585 | -2825.628158 |
| Cat101 | -3782.899287 | -3782.208725 | -3782.335248 |
| Cat102 | -2889.257407 | -2888.556057 | -2888.683231 |
| Cat103 | -2853.344508 | -2852.620078 | -2852.747846 |
| Cat104 | -2636.053699 | -2635.408399 | -2635.526958 |
| Cat105 | -2711.283458 | -2710.632841 | -2710.753369 |
| Cat106 | -2675.370985 | -2674.697341 | -2674.818527 |
| Cat107 | -3858.130840 | -3857.435029 | -3857.563206 |
| Cat108 | -3822.218132 | -3821.499279 | -3821.628213 |
| Cat109 | -3861.535832 | -3860.788679 | -3860.920585 |
| Cat110 | -3822.216812 | -3821.497224 | -3821.626876 |
| Cat111 | -3897.448025 | -3896.723662 | -3896.853384 |
| Cat112 | -3861.535492 | -3860.787755 | -3860.920907 |
| Cat113 | -3900.853424 | -3900.077721 | -3900.210600 |
| Cat114 | -3445.793828 | -3445.110613 | -3445.229331 |
| Cat115 | -3521.025150 | -3520.336930 | -3520.457895 |
| Cat116 | -3485.112777 | -3484.401581 | -3484.524013 |
| Cat117 | -3524.430844 | -3523.690964 | -3523.815285 |
| Cat118 | -3842.777607 | -3842.124060 | -3842.250304 |
| Cat119 | -3918.009078 | -3917.350198 | -3917.478399 |
| Cat120 | -3882.096291 | -3881.414276 | -3881.543150 |
| Cat121 | -3921.414075 | -3920.703386 | -3920.834359 |

|        |              |              |              |
|--------|--------------|--------------|--------------|
| Cat122 | -2907.329454 | -2906.661954 | -2906.784165 |
| Cat123 | -2061.122118 | -2060.471908 | -2060.575956 |
| Cat124 | -1929.251112 | -1928.601997 | -1928.703104 |
| Cat125 | -2364.544861 | -2363.894461 | -2363.998376 |
| Cat126 | -2490.100937 | -2489.449727 | -2489.563646 |
| Cat127 | -3861.534397 | -3860.786992 | -3860.918792 |
| Cat128 | -3900.850873 | -3900.075149 | -3900.210224 |
| Cat129 | -3900.851860 | -3900.076100 | -3900.209265 |
| Cat130 | -3940.167929 | -3939.363137 | -3939.502117 |
| Cat131 | -3230.282440 | -3229.616730 | -3229.740053 |
| Cat132 | -4302.357638 | -4301.435093 | -4301.583053 |
| Cat133 | -2735.330100 | -2734.665643 | -2734.784919 |
| Cat134 | -2603.448930 | -2602.785615 | -2602.901879 |
| Cat135 | -3038.741116 | -3038.076309 | -3038.195311 |
| Cat136 | -2490.102867 | -2489.451165 | -2489.564185 |
| Cat137 | -9793.129812 | -9792.441319 | -9792.571021 |
| Cat138 | -9832.448626 | -9831.732536 | -9831.863117 |
| Cat139 | -4662.012326 | -4661.303394 | -4661.445772 |
| Cat140 | -9871.764998 | -9871.020295 | -9871.153631 |
| Cat141 | -3078.059899 | -3077.366843 | -3077.488599 |
| Cat142 | -3117.376080 | -3116.654585 | -3116.779560 |
| Cat144 | -5081.390158 | -5080.699904 | -5080.824132 |
| Cat145 | -5120.706339 | -5119.987393 | -5120.114129 |

**Table S15.** Single-point electronic energies, quasi-harmonic enthalpies, and Gibbs free energies (298 K) of TS1 at the PCM/ $\omega$ B97X-D/Def2-TZVP//B97-D/Def2-SVP/PCM level, in Hartree.

| Catalyst | E SPC        | qh-H SPC     | qh-G(T) SPC  |
|----------|--------------|--------------|--------------|
| Cat0     | -2700.679897 | -2699.995754 | -2700.112220 |
| Cat1     | -3346.596334 | -3345.915218 | -3346.035178 |
| Cat2     | -2511.186741 | -2510.524549 | -2510.636918 |
| Cat3     | -2834.135035 | -2833.475245 | -2833.588267 |
| Cat4     | -2491.282327 | -2490.607983 | -2490.720614 |
| Cat5     | -2583.528148 | -2582.854080 | -2582.970394 |
| Cat6     | -2587.300557 | -2586.627829 | -2586.744510 |
| Cat7     | -2910.276360 | -2909.605718 | -2909.721387 |
| Cat8     | -2814.023597 | -2813.327890 | -2813.447027 |
| Cat9     | -2946.458392 | -2945.796278 | -2945.911717 |
| Cat10    | -2522.699141 | -2522.065265 | -2522.178444 |
| Cat11    | -2141.003778 | -2140.300169 | -2140.409223 |
| Cat12    | -1834.729749 | -1834.113991 | -1834.212784 |
| Cat13    | -2132.521306 | -2131.927587 | -2132.029362 |
| Cat14    | -1909.890202 | -1909.270810 | -1909.371614 |
| Cat15    | -2065.783060 | -2065.084356 | -2065.191465 |
| Cat16    | -2180.102192 | -2179.384392 | -2179.493938 |
| Cat17    | -2258.737788 | -2257.961924 | -2258.077147 |
| Cat18    | -2239.342318 | -2238.526123 | -2238.644823 |
| Cat19    | -2755.530083 | -2754.551199 | -2754.685515 |
| Cat20    | -2799.936556 | -2799.259049 | -2799.379583 |
| Cat21    | -2775.909767 | -2775.219632 | -2775.339809 |
| Cat22    | -2739.998298 | -2739.285936 | -2739.405232 |
| Cat23    | -3138.193034 | -3137.478058 | -3137.602375 |
| Cat24    | -3138.190848 | -3137.476086 | -3137.600110 |
| Cat25    | -2908.713486 | -2907.972877 | -2908.101921 |
| Cat26    | -2739.993332 | -2739.279189 | -2739.399229 |
| Cat27    | -2853.096700 | -2852.387386 | -2852.510468 |
| Cat28    | -2740.005934 | -2739.291531 | -2739.411381 |
| Cat29    | -2583.938635 | -2583.317870 | -2583.431566 |
| Cat30    | -2854.307456 | -2853.575323 | -2853.701243 |
| Cat31    | -2854.297336 | -2853.565780 | -2853.692113 |
| Cat32    | -3046.033055 | -3045.247382 | -3045.380219 |
| Cat33    | -2272.241301 | -2271.595234 | -2271.699673 |
| Cat34    | -2817.750961 | -2817.131585 | -2817.237048 |
| Cat35    | -2865.349374 | -2864.605346 | -2864.717352 |
| Cat36    | -2755.413235 | -2754.811344 | -2754.920204 |
| Cat37    | -1928.426868 | -1927.773809 | -1927.878119 |
| Cat38    | -2180.038775 | -2179.322141 | -2179.433638 |
| Cat39    | -2718.141196 | -2717.249186 | -2717.376884 |
| Cat40    | -2124.564302 | -2123.793540 | -2123.903773 |
| Cat41    | -2616.638058 | -2615.898294 | -2616.012186 |
| Cat42    | -3609.485981 | -3608.454506 | -3608.599793 |
| Cat43    | -2737.147349 | -2736.425689 | -2736.549588 |
| Cat44    | -2495.732662 | -2495.105138 | -2495.212984 |

|        |              |              |              |
|--------|--------------|--------------|--------------|
| Cat45  | -2194.987925 | -2194.362182 | -2194.461720 |
| Cat46  | -3113.836027 | -3113.123423 | -3113.246785 |
| Cat47  | -2332.769667 | -2332.010809 | -2332.124045 |
| Cat48  | -2026.736937 | -2026.050579 | -2026.155360 |
| Cat49  | -2238.565047 | -2237.862316 | -2237.964058 |
| Cat50  | -2230.249624 | -2229.610261 | -2229.713710 |
| Cat51  | -2542.108710 | -2541.379075 | -2541.488733 |
| Cat52  | -2009.211792 | -2008.471886 | -2008.583705 |
| Cat53  | -2621.955013 | -2621.328118 | -2621.442814 |
| Cat54  | -2349.036529 | -2348.276876 | -2348.395994 |
| Cat55  | -2062.305596 | -2061.661646 | -2061.767645 |
| Cat56  | -2466.769970 | -2465.938260 | -2466.063474 |
| Cat57  | -2918.165271 | -2917.522392 | -2917.628184 |
| Cat58  | -2661.694797 | -2661.168866 | -2661.267723 |
| Cat59  | -2865.322770 | -2864.580550 | -2864.697816 |
| Cat60  | -3746.801733 | -3745.724644 | -3745.872826 |
| Cat61  | -2865.336416 | -2864.592728 | -2864.705696 |
| Cat62  | -2486.835281 | -2486.176727 | -2486.290212 |
| Cat63  | -1744.486155 | -1743.900099 | -1743.993956 |
| Cat64  | -2018.258728 | -2017.681901 | -2017.779019 |
| Cat65  | -2089.158862 | -2088.337659 | -2088.451470 |
| Cat66  | -1951.507101 | -1950.826044 | -1950.928811 |
| Cat67  | -2431.522321 | -2430.741614 | -2430.852187 |
| Cat68  | -2412.117027 | -2411.296785 | -2411.409958 |
| Cat69  | -2928.310982 | -2927.326880 | -2927.456673 |
| Cat70  | -2873.447742 | -2872.759053 | -2872.872024 |
| Cat71  | -2007.507920 | -2006.888606 | -2006.984050 |
| Cat72  | -2429.382224 | -2428.478875 | -2428.600169 |
| Cat73  | -2202.959925 | -2202.146736 | -2202.260557 |
| Cat74  | -2183.551344 | -2182.699068 | -2182.816998 |
| Cat75  | -2293.889423 | -2293.170607 | -2293.277049 |
| Cat76  | -1970.913508 | -1970.190901 | -1970.295750 |
| Cat77  | -1756.892668 | -1756.258312 | -1756.354390 |
| Cat78  | -2215.367548 | -2214.635606 | -2214.746831 |
| Cat79  | -2559.172376 | -2558.501866 | -2558.619424 |
| Cat80  | -2216.819167 | -2216.048807 | -2216.162293 |
| Cat81  | -2054.688903 | -2054.077434 | -2054.179194 |
| Cat82  | -2846.833125 | -2846.180715 | -2846.297650 |
| Cat83  | -2066.701246 | -2065.997533 | -2066.106646 |
| Cat84  | -2106.014821 | -2105.281156 | -2105.393793 |
| Cat85  | -2219.137125 | -2218.405649 | -2218.516469 |
| Cat86  | -2125.953552 | -2125.150263 | -2125.265709 |
| Cat87  | -2002.741437 | -2002.199341 | -2002.293905 |
| Cat88  | -3064.371776 | -3063.412743 | -3063.547385 |
| Cat89  | -2314.693421 | -2313.979888 | -2314.088726 |
| Cat90  | -2788.111736 | -2787.391253 | -2787.504882 |
| Cat91  | -1927.580302 | -1927.041999 | -1927.134447 |
| Cat92  | -2098.466474 | -2097.830361 | -2097.935675 |
| Cat93  | -3306.387945 | -3305.366856 | -3305.508456 |
| Cat94  | -2580.118354 | -2579.275024 | -2579.402210 |
| Cat95  | -2789.673537 | -2788.980905 | -2789.103444 |
| Cat96  | -2425.884243 | -2425.188456 | -2425.293672 |
| Cat97  | -2410.811542 | -2410.142356 | -2410.247050 |
| Cat98  | -2942.029583 | -2941.245942 | -2941.362330 |
| Cat99  | -2815.808861 | -2815.207221 | -2815.310551 |
| Cat100 | -2826.236861 | -2825.507460 | -2825.619995 |
| Cat101 | -3782.897814 | -3782.207572 | -3782.331004 |
| Cat102 | -2889.253789 | -2888.552679 | -2888.673620 |
| Cat103 | -2853.342367 | -2852.618672 | -2852.741186 |
| Cat104 | -2636.045518 | -2635.401127 | -2635.515355 |
| Cat105 | -2711.280126 | -2710.629641 | -2710.746828 |
| Cat106 | -2675.368613 | -2674.695340 | -2674.813678 |
| Cat107 | -3858.128236 | -3857.432596 | -3857.558137 |
| Cat108 | -3822.216615 | -3821.498176 | -3821.624496 |
| Cat109 | -3861.532923 | -3860.786013 | -3860.914771 |
| Cat110 | -3822.215156 | -3821.495596 | -3821.622157 |
| Cat111 | -3897.445539 | -3896.720537 | -3896.848962 |
| Cat112 | -3861.533970 | -3860.786274 | -3860.915737 |
| Cat113 | -3900.850227 | -3900.074525 | -3900.204155 |
| Cat114 | -3445.793754 | -3445.111118 | -3445.227107 |
| Cat115 | -3521.024207 | -3520.336240 | -3520.454193 |
| Cat116 | -3485.112568 | -3484.401692 | -3484.520529 |
| Cat117 | -3524.428921 | -3523.689492 | -3523.810698 |
| Cat118 | -3842.775974 | -3842.123066 | -3842.244317 |
| Cat119 | -3918.006462 | -3917.348123 | -3917.471065 |

|        |              |              |              |
|--------|--------------|--------------|--------------|
| Cat120 | -3882.095295 | -3881.414396 | -3881.538749 |
| Cat121 | -3921.411333 | -3920.701903 | -3920.828032 |
| Cat122 | -2907.325011 | -2906.657734 | -2906.777476 |
| Cat123 | -2061.116812 | -2060.466758 | -2060.567783 |
| Cat124 | -1929.244858 | -1928.595828 | -1928.693869 |
| Cat125 | -2364.540306 | -2363.890012 | -2363.990774 |
| Cat126 | -2490.093125 | -2489.441699 | -2489.552146 |
| Cat127 | -3861.532903 | -3860.786565 | -3860.914427 |
| Cat128 | -3900.849149 | -3900.074226 | -3900.204091 |
| Cat129 | -3900.850247 | -3900.074307 | -3900.204255 |
| Cat130 | -3940.166492 | -3939.361738 | -3939.497332 |
| Cat131 | -3230.277158 | -3229.611402 | -3229.731559 |
| Cat132 | -4302.355796 | -4301.432776 | -4301.576600 |
| Cat133 | -2735.326463 | -2734.661762 | -2734.777430 |
| Cat134 | -2603.443491 | -2602.780199 | -2602.893398 |
| Cat135 | -3038.737968 | -3038.073187 | -3038.189194 |
| Cat136 | -2490.095936 | -2489.444140 | -2489.554165 |
| Cat137 | -9793.129360 | -9792.441133 | -9792.567227 |
| Cat138 | -9832.448174 | -9831.731708 | -9831.860658 |
| Cat139 | -4662.005731 | -4661.297045 | -4661.436595 |
| Cat140 | -9871.764536 | -9871.019523 | -9871.151529 |
| Cat141 | -3078.056567 | -3077.363356 | -3077.481981 |
| Cat142 | -3117.372981 | -3116.651556 | -3116.773318 |
| Cat143 | -5042.068970 | -5041.406739 | -5041.524970 |
| Cat144 | -5081.387623 | -5080.697068 | -5080.817443 |
| Cat145 | -5120.703973 | -5119.985119 | -5120.108771 |

**Table S16.** Single-point electronic energies, quasi-harmonic enthalpies, and Gibbs free energies (298 K) of intermediate **3** at the PCM/ $\omega$ B97X-D/Def2-TZVP//B97-D/Def2-SVP/PCM level, in Hartree.

| Catalyst | E_SPC        | qh-H_SPC     | qh-G(T)_SPC  |
|----------|--------------|--------------|--------------|
| Cat0     | -2700.706224 | -2700.019521 | -2700.137357 |
| Cat1     | -3346.624609 | -3345.941520 | -3346.060887 |
| Cat2     | -2511.211146 | -2510.547111 | -2510.659364 |
| Cat3     | -2834.160483 | -2833.498946 | -2833.612024 |
| Cat4     | -2491.306536 | -2490.630162 | -2490.742355 |
| Cat5     | -2583.553714 | -2582.877777 | -2582.993901 |
| Cat6     | -2587.323903 | -2586.648102 | -2586.763393 |
| Cat7     | -2910.297142 | -2909.624207 | -2909.740556 |
| Cat8     | -2814.044845 | -2813.347060 | -2813.468366 |
| Cat9     | -2946.484221 | -2945.820562 | -2945.935390 |
| Cat10    | -2522.723152 | -2522.087562 | -2522.200228 |
| Cat11    | -2141.027685 | -2140.322391 | -2140.431250 |
| Cat12    | -1834.752323 | -1834.134797 | -1834.233288 |
| Cat13    | -2132.545023 | -2131.949687 | -2132.051355 |
| Cat14    | -1909.913174 | -1909.292179 | -1909.393141 |
| Cat15    | -2065.805373 | -2065.104906 | -2065.212084 |
| Cat16    | -2180.125646 | -2179.406093 | -2179.515422 |
| Cat17    | -2258.760517 | -2257.983009 | -2258.097738 |
| Cat18    | -2239.366581 | -2238.548546 | -2238.666872 |
| Cat19    | -2755.555641 | -2754.575093 | -2754.709401 |
| Cat20    | -2799.961033 | -2799.281816 | -2799.401649 |
| Cat21    | -2775.936613 | -2775.244805 | -2775.364685 |
| Cat22    | -2740.024402 | -2739.309744 | -2739.430755 |
| Cat23    | -3138.217541 | -3137.500528 | -3137.623882 |
| Cat24    | -3138.217073 | -3137.500355 | -3137.623762 |
| Cat25    | -2908.736692 | -2907.994016 | -2908.121916 |
| Cat26    | -2740.021211 | -2739.305059 | -2739.424678 |
| Cat27    | -2853.120424 | -2852.409063 | -2852.531020 |
| Cat28    | -2740.032192 | -2739.315889 | -2739.434991 |
| Cat29    | -2583.963435 | -2583.340713 | -2583.453765 |
| Cat30    | -2854.333127 | -2853.599291 | -2853.724619 |
| Cat31    | -2854.323753 | -2853.590179 | -2853.715459 |
| Cat32    | -3046.058714 | -3045.270850 | -3045.402838 |
| Cat33    | -2272.263027 | -2271.615177 | -2271.719398 |
| Cat34    | -2817.776708 | -2817.155592 | -2817.260588 |
| Cat35    | -2865.373537 | -2864.627741 | -2864.739601 |
| Cat36    | -2755.437179 | -2754.833748 | -2754.942474 |
| Cat37    | -1928.448112 | -1927.793146 | -1927.897098 |
| Cat38    | -2180.059843 | -2179.341441 | -2179.452517 |
| Cat39    | -2718.163648 | -2717.269643 | -2717.396783 |
| Cat40    | -2124.586276 | -2123.813500 | -2123.923236 |
| Cat41    | -2616.659488 | -2615.917103 | -2616.032546 |

|        |              |              |              |
|--------|--------------|--------------|--------------|
| Cat42  | -3609.511159 | -3608.477989 | -3608.623314 |
| Cat43  | -2737.172151 | -2736.448798 | -2736.572361 |
| Cat44  | -2495.752403 | -2495.123053 | -2495.230774 |
| Cat45  | -2195.012614 | -2194.385012 | -2194.484136 |
| Cat46  | -3113.858301 | -3113.144244 | -3113.267342 |
| Cat47  | -2332.793156 | -2332.032471 | -2332.145516 |
| Cat48  | -2026.760028 | -2026.071921 | -2026.176493 |
| Cat49  | -2238.588379 | -2237.882660 | -2237.985112 |
| Cat50  | -2230.273125 | -2229.631819 | -2229.734753 |
| Cat51  | -2542.132114 | -2541.400141 | -2541.511315 |
| Cat52  | -2009.232794 | -2008.491015 | -2008.602641 |
| Cat53  | -2621.978532 | -2621.350132 | -2621.464700 |
| Cat54  | -2349.058919 | -2348.297760 | -2348.417010 |
| Cat55  | -2062.326814 | -2061.681104 | -2061.786277 |
| Cat56  | -2466.791022 | -2465.957691 | -2466.082701 |
| Cat57  | -2918.188617 | -2917.543947 | -2917.649307 |
| Cat58  | -2661.719683 | -2661.191930 | -2661.290257 |
| Cat59  | -2865.346677 | -2864.602528 | -2864.718561 |
| Cat60  | -3746.824958 | -3745.746124 | -3745.894334 |
| Cat61  | -2865.363258 | -2864.617922 | -2864.730696 |
| Cat62  | -2486.858553 | -2486.198149 | -2486.311301 |
| Cat63  | -1744.508018 | -1743.920195 | -1744.013952 |
| Cat64  | -2018.282145 | -2017.703693 | -2017.800658 |
| Cat65  | -2089.182278 | -2088.358165 | -2088.472544 |
| Cat66  | -1951.530562 | -1950.847787 | -1950.950540 |
| Cat67  | -2431.545734 | -2430.763212 | -2430.873165 |
| Cat68  | -2412.142001 | -2411.318885 | -2411.432467 |
| Cat69  | -2928.335389 | -2927.349854 | -2927.479901 |
| Cat70  | -2873.474609 | -2872.783417 | -2872.898161 |
| Cat71  | -2007.531660 | -2006.910488 | -2007.005614 |
| Cat72  | -2429.405144 | -2428.498691 | -2428.621699 |
| Cat73  | -2202.981666 | -2202.166721 | -2202.280232 |
| Cat74  | -2183.574120 | -2182.719056 | -2182.837816 |
| Cat75  | -2293.911605 | -2293.191014 | -2293.297131 |
| Cat76  | -1970.938073 | -1970.213306 | -1970.317476 |
| Cat77  | -1756.918978 | -1756.282440 | -1756.379776 |
| Cat78  | -2215.390177 | -2214.656385 | -2214.767285 |
| Cat79  | -2559.196375 | -2558.524076 | -2558.641163 |
| Cat80  | -2216.842395 | -2216.070051 | -2216.182727 |
| Cat81  | -2054.713924 | -2054.100959 | -2054.202580 |
| Cat82  | -2846.857314 | -2846.202912 | -2846.318920 |
| Cat83  | -2066.722411 | -2066.016194 | -2066.126430 |
| Cat84  | -2106.034879 | -2105.299352 | -2105.412236 |
| Cat85  | -2219.158817 | -2218.425450 | -2218.535945 |
| Cat86  | -2125.975974 | -2125.170149 | -2125.286795 |
| Cat87  | -2002.760397 | -2002.216482 | -2002.310925 |
| Cat88  | -3064.391101 | -3063.430042 | -3063.563757 |
| Cat89  | -2314.713061 | -2313.997775 | -2314.106648 |
| Cat90  | -2788.131399 | -2787.409091 | -2787.522335 |
| Cat91  | -1927.599123 | -1927.058968 | -1927.151174 |
| Cat92  | -2098.486675 | -2097.848798 | -2097.954202 |
| Cat93  | -3306.409356 | -3305.386681 | -3305.528300 |
| Cat94  | -2580.137751 | -2579.292401 | -2579.419302 |
| Cat95  | -2789.690535 | -2788.995528 | -2789.117518 |
| Cat96  | -2425.909670 | -2425.212036 | -2425.316908 |
| Cat97  | -2410.835690 | -2410.164834 | -2410.269511 |
| Cat98  | -2942.052593 | -2941.266987 | -2941.382705 |
| Cat99  | -2815.833363 | -2815.230126 | -2815.333534 |
| Cat100 | -2826.262359 | -2825.531301 | -2825.643963 |
| Cat101 | -3782.919086 | -3782.227241 | -3782.350548 |
| Cat102 | -2889.274843 | -2888.571751 | -2888.694960 |
| Cat103 | -2853.363639 | -2852.637508 | -2852.761630 |
| Cat104 | -2636.070465 | -2635.423681 | -2635.539005 |
| Cat105 | -2711.300448 | -2710.648278 | -2710.765340 |
| Cat106 | -2675.389239 | -2674.714223 | -2674.832311 |
| Cat107 | -3858.149210 | -3857.451949 | -3857.577024 |
| Cat108 | -3822.237896 | -3821.517855 | -3821.644166 |
| Cat109 | -3861.554009 | -3860.805429 | -3860.934798 |
| Cat110 | -3822.235378 | -3821.514378 | -3821.641558 |
| Cat111 | -3897.465573 | -3896.739112 | -3896.868407 |
| Cat112 | -3861.554230 | -3860.804955 | -3860.934764 |
| Cat113 | -3900.870311 | -3900.092374 | -3900.223933 |
| Cat114 | -3445.814613 | -3445.130225 | -3445.246258 |
| Cat115 | -3521.044706 | -3520.354922 | -3520.472751 |
| Cat116 | -3485.133410 | -3484.420786 | -3484.539604 |

|        |              |              |              |
|--------|--------------|--------------|--------------|
| Cat117 | -3524.449580 | -3523.708256 | -3523.829259 |
| Cat118 | -3842.795661 | -3842.139802 | -3842.262239 |
| Cat119 | -3918.028079 | -3917.367538 | -3917.492346 |
| Cat120 | -3882.116731 | -3881.433689 | -3881.559868 |
| Cat121 | -3921.432758 | -3920.721209 | -3920.849644 |
| Cat122 | -2907.350684 | -2906.681459 | -2906.799880 |
| Cat123 | -2061.141506 | -2060.489805 | -2060.590631 |
| Cat124 | -1929.269054 | -1928.618227 | -1928.716045 |
| Cat125 | -2364.565186 | -2363.913106 | -2364.013713 |
| Cat126 | -2490.116937 | -2489.463610 | -2489.573674 |
| Cat127 | -3861.554281 | -3860.805818 | -3860.935624 |
| Cat128 | -3900.870572 | -3900.093403 | -3900.225279 |
| Cat129 | -3900.870687 | -3900.092968 | -3900.225628 |
| Cat130 | -3940.186837 | -3939.380623 | -3939.516396 |
| Cat131 | -3230.302475 | -3229.635134 | -3229.755169 |
| Cat132 | -4302.376162 | -4301.451363 | -4301.595257 |
| Cat133 | -2735.351653 | -2734.685310 | -2734.800574 |
| Cat134 | -2603.468383 | -2602.803504 | -2602.916802 |
| Cat135 | -3038.763372 | -3038.096698 | -3038.211805 |
| Cat136 | -2490.120001 | -2489.466693 | -2489.576557 |
| Cat137 | -9793.150715 | -9792.460812 | -9792.586846 |
| Cat138 | -9832.469528 | -9831.751384 | -9831.880276 |
| Cat139 | -4662.031592 | -4661.320778 | -4661.458804 |
| Cat140 | -9871.785853 | -9871.039143 | -9871.171001 |
| Cat141 | -3078.082046 | -3077.387078 | -3077.505349 |
| Cat142 | -3117.398515 | -3116.674948 | -3116.795540 |
| Cat143 | -5042.094978 | -5041.431034 | -5041.548307 |
| Cat144 | -5081.413649 | -5080.721377 | -5080.841447 |
| Cat145 | -5120.730083 | -5120.009243 | -5120.132099 |

**Table S17.** Single-point electronic energies, quasi-harmonic enthalpies, and Gibbs free energies (298 K) of TS2 at the PCM/ $\omega$ B97X-D/Def2-TZVP//B97-D/Def2-SVP/PCM level, in Hartree.

| Catalyst | E SPC        | qh-H SPC     | qh-G(T) SPC  |
|----------|--------------|--------------|--------------|
| Cat0     | -2700.701943 | -2700.016156 | -2700.131419 |
| Cat1     | -3346.618420 | -3345.935390 | -3346.054069 |
| Cat2     | -2511.206456 | -2510.542630 | -2510.653266 |
| Cat3     | -2834.154386 | -2833.492809 | -2833.604337 |
| Cat4     | -2491.303942 | -2490.628075 | -2490.738886 |
| Cat5     | -2583.547971 | -2582.872054 | -2582.986317 |
| Cat6     | -2587.319872 | -2586.645572 | -2586.761242 |
| Cat7     | -2910.292301 | -2909.619345 | -2909.735412 |
| Cat8     | -2814.038259 | -2813.340021 | -2813.459214 |
| Cat9     | -2946.482119 | -2945.818473 | -2945.933259 |
| Cat10    | -2522.717645 | -2522.082088 | -2522.193450 |
| Cat11    | -2141.024438 | -2140.319284 | -2140.427119 |
| Cat12    | -1834.748181 | -1834.130878 | -1834.227988 |
| Cat13    | -2132.539396 | -2131.943912 | -2132.044229 |
| Cat14    | -1909.912728 | -1909.291978 | -1909.391655 |
| Cat15    | -2065.800590 | -2065.100199 | -2065.205665 |
| Cat16    | -2180.121833 | -2179.402597 | -2179.510584 |
| Cat17    | -2258.757038 | -2257.979798 | -2258.093610 |
| Cat18    | -2239.362099 | -2238.544369 | -2238.661602 |
| Cat19    | -2755.545824 | -2754.565704 | -2754.699317 |
| Cat20    | -2799.955179 | -2799.275696 | -2799.393945 |
| Cat21    | -2775.930897 | -2775.239210 | -2775.359049 |
| Cat22    | -2740.017391 | -2739.302537 | -2739.422586 |
| Cat23    | -3138.212927 | -3137.495896 | -3137.618078 |
| Cat24    | -3138.216132 | -3137.499480 | -3137.621731 |
| Cat25    | -2908.733029 | -2907.990332 | -2908.117300 |
| Cat26    | -2740.013569 | -2739.298301 | -2739.418613 |
| Cat27    | -2853.122388 | -2852.411470 | -2852.530508 |
| Cat28    | -2740.021997 | -2739.306891 | -2739.427067 |
| Cat29    | -2583.961217 | -2583.339054 | -2583.451605 |
| Cat30    | -2854.328135 | -2853.594189 | -2853.717798 |
| Cat31    | -2854.318406 | -2853.584484 | -2853.708176 |
| Cat32    | -3046.054140 | -3045.266257 | -3045.396665 |
| Cat33    | -2272.262160 | -2271.614574 | -2271.717429 |
| Cat34    | -2817.770321 | -2817.149046 | -2817.252627 |
| Cat35    | -2865.370233 | -2864.624697 | -2864.735438 |
| Cat36    | -2755.434374 | -2754.830955 | -2754.938391 |
| Cat37    | -1928.448794 | -1927.794167 | -1927.896938 |
| Cat38    | -2180.042010 | -2179.324456 | -2179.432876 |

|        |              |              |              |
|--------|--------------|--------------|--------------|
| Cat39  | -2718.162039 | -2717.269373 | -2717.393781 |
| Cat40  | -2124.588780 | -2123.817529 | -2123.924535 |
| Cat41  | -2616.660937 | -2615.918318 | -2616.031602 |
| Cat42  | -3609.505741 | -3608.472374 | -3608.616316 |
| Cat43  | -2737.169196 | -2736.445843 | -2736.567316 |
| Cat44  | -2495.749182 | -2495.119542 | -2495.225505 |
| Cat45  | -2195.008208 | -2194.380920 | -2194.479359 |
| Cat46  | -3113.853426 | -3113.140145 | -3113.263475 |
| Cat47  | -2332.789827 | -2332.029119 | -2332.140791 |
| Cat48  | -2026.757163 | -2026.069036 | -2026.172004 |
| Cat49  | -2238.586806 | -2237.881718 | -2237.983090 |
| Cat50  | -2230.271432 | -2229.630732 | -2229.733490 |
| Cat51  | -2542.116809 | -2541.385677 | -2541.496153 |
| Cat52  | -2009.234020 | -2008.492621 | -2008.602680 |
| Cat53  | -2621.971831 | -2621.344151 | -2621.455842 |
| Cat54  | -2349.055952 | -2348.294850 | -2348.412847 |
| Cat55  | -2062.330479 | -2061.684701 | -2061.789279 |
| Cat56  | -2466.790859 | -2465.957557 | -2466.081080 |
| Cat57  | -2918.185271 | -2917.540680 | -2917.644575 |
| Cat58  | -2661.709563 | -2661.182503 | -2661.278772 |
| Cat59  | -2865.343042 | -2864.598592 | -2864.712820 |
| Cat60  | -3746.816226 | -3745.738451 | -3745.883307 |
| Cat61  | -2865.359562 | -2864.614243 | -2864.725734 |
| Cat62  | -2486.850761 | -2486.191396 | -2486.301829 |
| Cat63  | -1744.507513 | -1743.920253 | -1744.012831 |
| Cat64  | -2018.277717 | -2017.699370 | -2017.795185 |
| Cat65  | -2089.180395 | -2088.358099 | -2088.473061 |
| Cat66  | -1951.526864 | -1950.844223 | -1950.945595 |
| Cat67  | -2431.544489 | -2430.762224 | -2430.871204 |
| Cat68  | -2412.141920 | -2411.320091 | -2411.434236 |
| Cat69  | -2928.336199 | -2927.350226 | -2927.477648 |
| Cat70  | -2873.469593 | -2872.778646 | -2872.892031 |
| Cat71  | -2007.528259 | -2006.907511 | -2007.001551 |
| Cat72  | -2429.411018 | -2428.504940 | -2428.625733 |
| Cat73  | -2202.984087 | -2202.170318 | -2202.280977 |
| Cat74  | -2183.576405 | -2182.722288 | -2182.837894 |
| Cat75  | -2293.913499 | -2293.193356 | -2293.298555 |
| Cat76  | -1970.928535 | -1970.204733 | -1970.306818 |
| Cat77  | -1756.916741 | -1756.280224 | -1756.376223 |
| Cat78  | -2215.393044 | -2214.659448 | -2214.768967 |
| Cat79  | -2559.193345 | -2558.521206 | -2558.637118 |
| Cat80  | -2216.836925 | -2216.065332 | -2216.175943 |
| Cat81  | -2054.701937 | -2054.089584 | -2054.189112 |
| Cat82  | -2846.855947 | -2846.201857 | -2846.316941 |
| Cat83  | -2066.722339 | -2066.016291 | -2066.125361 |
| Cat84  | -2106.034442 | -2105.298789 | -2105.409787 |
| Cat85  | -2219.143488 | -2218.410109 | -2218.518966 |
| Cat86  | -2125.975305 | -2125.170585 | -2125.284429 |
| Cat87  | -2002.758100 | -2002.214480 | -2002.307305 |
| Cat88  | -3064.396242 | -3063.435556 | -3063.567950 |
| Cat89  | -2314.710343 | -2313.995186 | -2314.102395 |
| Cat90  | -2788.130307 | -2787.408087 | -2787.519644 |
| Cat91  | -1927.598057 | -1927.058126 | -1927.149308 |
| Cat92  | -2098.481279 | -2097.843348 | -2097.946941 |
| Cat93  | -3306.403413 | -3305.379958 | -3305.520051 |
| Cat94  | -2580.140888 | -2579.295494 | -2579.420466 |
| Cat95  | -2789.687363 | -2788.992289 | -2789.112658 |
| Cat96  | -2425.903513 | -2425.206113 | -2425.309632 |
| Cat97  | -2410.831829 | -2410.161096 | -2410.264528 |
| Cat98  | -2942.051549 | -2941.266400 | -2941.381388 |
| Cat99  | -2815.836242 | -2815.232594 | -2815.334981 |
| Cat100 | -2826.256816 | -2825.525642 | -2825.636438 |
| Cat101 | -3782.911478 | -3782.219013 | -3782.340379 |
| Cat102 | -2889.269082 | -2888.565615 | -2888.686701 |
| Cat103 | -2853.358890 | -2852.633360 | -2852.754248 |
| Cat104 | -2636.062898 | -2635.415881 | -2635.529525 |
| Cat105 | -2711.293729 | -2710.641079 | -2710.756289 |
| Cat106 | -2675.381684 | -2674.706076 | -2674.822191 |
| Cat107 | -3858.142376 | -3857.444649 | -3857.568126 |
| Cat108 | -3822.230168 | -3821.509609 | -3821.634092 |
| Cat109 | -3861.546811 | -3860.798363 | -3860.923242 |
| Cat110 | -3822.230299 | -3821.509331 | -3821.634866 |
| Cat111 | -3897.461247 | -3896.735477 | -3896.860281 |
| Cat112 | -3861.548918 | -3860.800123 | -3860.925711 |
| Cat113 | -3900.865466 | -3900.087751 | -3900.218225 |

|        |              |              |              |
|--------|--------------|--------------|--------------|
| Cat114 | -3445.807494 | -3445.123011 | -3445.237757 |
| Cat115 | -3521.038513 | -3520.348733 | -3520.465350 |
| Cat116 | -3485.126285 | -3484.413453 | -3484.530936 |
| Cat117 | -3524.442565 | -3523.702077 | -3523.820580 |
| Cat118 | -3842.789497 | -3842.134084 | -3842.253209 |
| Cat119 | -3918.020560 | -3917.359482 | -3917.482495 |
| Cat120 | -3882.108116 | -3881.424553 | -3881.546512 |
| Cat121 | -3921.424869 | -3920.712439 | -3920.838759 |
| Cat122 | -2907.342688 | -2906.673522 | -2906.790603 |
| Cat123 | -2061.134129 | -2060.482316 | -2060.581660 |
| Cat124 | -1929.262728 | -1928.612262 | -1928.709014 |
| Cat125 | -2364.557421 | -2363.905346 | -2364.004474 |
| Cat126 | -2490.112877 | -2489.459761 | -2489.568523 |
| Cat127 | -3861.546667 | -3860.797890 | -3860.922733 |
| Cat128 | -3900.862858 | -3900.085355 | -3900.215535 |
| Cat129 | -3900.865371 | -3900.088201 | -3900.217141 |
| Cat130 | -3940.181572 | -3939.375322 | -3939.509531 |
| Cat131 | -3230.293693 | -3229.626546 | -3229.744762 |
| Cat132 | -4302.373179 | -4301.448689 | -4301.591390 |
| Cat133 | -2735.343177 | -2734.676798 | -2734.790691 |
| Cat134 | -2603.461239 | -2602.796048 | -2602.907081 |
| Cat135 | -3038.754494 | -3038.087794 | -3038.201492 |
| Cat136 | -2490.114619 | -2489.461326 | -2489.569636 |
| Cat137 | -9793.142535 | -9792.452088 | -9792.576689 |
| Cat138 | -9832.461749 | -9831.744060 | -9831.870106 |
| Cat139 | -4662.027902 | -4661.317234 | -4661.454128 |
| Cat140 | -9871.778068 | -9871.031518 | -9871.162890 |
| Cat141 | -3078.073157 | -3077.378329 | -3077.495173 |
| Cat142 | -3117.389529 | -3116.666232 | -3116.785721 |
| Cat143 | -5042.085483 | -5041.421301 | -5041.537007 |
| Cat144 | -5081.404134 | -5080.711859 | -5080.830489 |
| Cat145 | -5120.720489 | -5119.999756 | -5120.121284 |

**Table S18.** Single-point electronic energies, quasi-harmonic enthalpies, and Gibbs free energies (298 K) of intermediate **4** at the PCM/ $\omega$ B97X-D/Def2-TZVP//B97-D/Def2-SVP/PCM level, in Hartree.

| Catalyst | E_SPC        | qh-H_SPC     | qh-G(T)_SPC  |
|----------|--------------|--------------|--------------|
| Cat0     | -2700.711442 | -2700.023859 | -2700.142439 |
| Cat1     | -3346.626080 | -3345.941974 | -3346.061417 |
| Cat2     | -2511.219267 | -2510.554540 | -2510.666164 |
| Cat3     | -2834.164903 | -2833.502505 | -2833.615097 |
| Cat4     | -2491.316056 | -2490.639070 | -2490.750709 |
| Cat5     | -2583.558326 | -2582.881369 | -2582.996668 |
| Cat6     | -2587.336274 | -2586.660779 | -2586.776996 |
| Cat7     | -2910.308772 | -2909.634484 | -2909.751020 |
| Cat8     | -2814.048092 | -2813.348966 | -2813.469437 |
| Cat9     | -2946.495526 | -2945.831124 | -2945.947178 |
| Cat10    | -2522.730416 | -2522.093941 | -2522.206948 |
| Cat11    | -2141.033931 | -2140.327819 | -2140.436883 |
| Cat12    | -1834.761359 | -1834.143202 | -1834.241818 |
| Cat13    | -2132.549628 | -2131.952850 | -2132.053927 |
| Cat14    | -1909.922996 | -1909.301127 | -1909.401338 |
| Cat15    | -2065.815689 | -2065.114534 | -2065.221775 |
| Cat16    | -2180.135475 | -2179.415134 | -2179.523995 |
| Cat17    | -2258.771416 | -2257.993033 | -2258.107434 |
| Cat18    | -2239.378768 | -2238.559817 | -2238.677841 |
| Cat19    | -2755.560160 | -2754.579200 | -2754.713702 |
| Cat20    | -2799.969282 | -2799.289061 | -2799.408893 |
| Cat21    | -2775.940841 | -2775.248152 | -2775.368745 |
| Cat22    | -2740.029497 | -2739.313951 | -2739.435324 |
| Cat23    | -3138.227183 | -3137.508989 | -3137.632080 |
| Cat24    | -3138.228360 | -3137.507817 | -3137.630641 |
| Cat25    | -2908.747698 | -2908.003787 | -2908.131733 |
| Cat26    | -2740.027851 | -2739.310861 | -2739.430524 |
| Cat27    | -2853.134818 | -2852.422235 | -2852.544694 |
| Cat28    | -2740.039033 | -2739.321639 | -2739.440848 |
| Cat29    | -2583.970596 | -2583.347372 | -2583.460863 |
| Cat30    | -2854.340661 | -2853.605543 | -2853.730119 |
| Cat31    | -2854.329960 | -2853.594851 | -2853.719384 |
| Cat32    | -3046.066714 | -3045.277939 | -3045.409576 |
| Cat33    | -2272.277293 | -2271.628665 | -2271.732730 |
| Cat34    | -2817.780655 | -2817.158358 | -2817.262949 |
| Cat35    | -2865.382270 | -2864.635682 | -2864.747484 |



|        |              |              |              |
|--------|--------------|--------------|--------------|
| Cat36  | -2755.446346 | -2754.841833 | -2754.950143 |
| Cat37  | -1928.464008 | -1927.808178 | -1927.911798 |
| Cat38  | -2180.080657 | -2179.360825 | -2179.470915 |
| Cat39  | -2718.177872 | -2717.283209 | -2717.409999 |
| Cat40  | -2124.602874 | -2123.829987 | -2123.940311 |
| Cat41  | -2616.675136 | -2615.931589 | -2616.046164 |
| Cat42  | -3609.519713 | -3608.485177 | -3608.629986 |
| Cat43  | -2737.180883 | -2736.456746 | -2736.579647 |
| Cat44  | -2495.764958 | -2495.134195 | -2495.241286 |
| Cat45  | -2195.021794 | -2194.393669 | -2194.493462 |
| Cat46  | -3113.869967 | -3113.155071 | -3113.278407 |
| Cat47  | -2332.802334 | -2332.040445 | -2332.153116 |
| Cat48  | -2026.770662 | -2026.081699 | -2026.185635 |
| Cat49  | -2238.601932 | -2237.896141 | -2237.998767 |
| Cat50  | -2230.284994 | -2229.642855 | -2229.746102 |
| Cat51  | -2542.138073 | -2541.405313 | -2541.516047 |
| Cat52  | -2009.252534 | -2008.509898 | -2008.620604 |
| Cat53  | -2621.987060 | -2621.358082 | -2621.470331 |
| Cat54  | -2349.071214 | -2348.308800 | -2348.427825 |
| Cat55  | -2062.342592 | -2061.695411 | -2061.800475 |
| Cat56  | -2466.807140 | -2465.972681 | -2466.097432 |
| Cat57  | -2918.199249 | -2917.553588 | -2917.658738 |
| Cat58  | -2661.723448 | -2661.194343 | -2661.292292 |
| Cat59  | -2865.354307 | -2864.608890 | -2864.724221 |
| Cat60  | -3746.838824 | -3745.759236 | -3745.908132 |
| Cat61  | -2865.371116 | -2864.624589 | -2864.736532 |
| Cat62  | -2486.869086 | -2486.207743 | -2486.320560 |
| Cat63  | -1744.522023 | -1743.933600 | -1744.027133 |
| Cat64  | -2018.290549 | -2017.711125 | -2017.808011 |
| Cat65  | -2089.196177 | -2088.373075 | -2088.489690 |
| Cat66  | -1951.540065 | -1950.856474 | -1950.958524 |
| Cat67  | -2431.558126 | -2430.775101 | -2430.885184 |
| Cat68  | -2412.156977 | -2411.334034 | -2411.449220 |
| Cat69  | -2928.349869 | -2927.363080 | -2927.491668 |
| Cat70  | -2873.480695 | -2872.788741 | -2872.902992 |
| Cat71  | -2007.539910 | -2006.918305 | -2007.013563 |
| Cat72  | -2429.424777 | -2428.517786 | -2428.639768 |
| Cat73  | -2202.998120 | -2202.182628 | -2202.296465 |
| Cat74  | -2183.590376 | -2182.734382 | -2182.852689 |
| Cat75  | -2293.927146 | -2293.205884 | -2293.311898 |
| Cat76  | -1970.946440 | -1970.220995 | -1970.325048 |
| Cat77  | -1756.928875 | -1756.291212 | -1756.388303 |
| Cat78  | -2215.407580 | -2214.672867 | -2214.783297 |
| Cat79  | -2559.205623 | -2558.532346 | -2558.649305 |
| Cat80  | -2216.854559 | -2216.081508 | -2216.194414 |
| Cat81  | -2054.717543 | -2054.103243 | -2054.204644 |
| Cat82  | -2846.873810 | -2846.218637 | -2846.335378 |
| Cat83  | -2066.740646 | -2066.033517 | -2066.144188 |
| Cat84  | -2106.051767 | -2105.314987 | -2105.426989 |
| Cat85  | -2219.168233 | -2218.433843 | -2218.544386 |
| Cat86  | -2125.993657 | -2125.186955 | -2125.302626 |
| Cat87  | -2002.774706 | -2002.229971 | -2002.323837 |
| Cat88  | -3064.413364 | -3063.451299 | -3063.584169 |
| Cat89  | -2314.727010 | -2314.010598 | -2314.118536 |
| Cat90  | -2788.148285 | -2787.424429 | -2787.536257 |
| Cat91  | -1927.615468 | -1927.074206 | -1927.166014 |
| Cat92  | -2098.491310 | -2097.852109 | -2097.956797 |
| Cat93  | -3306.420094 | -3305.395540 | -3305.536520 |
| Cat94  | -2580.154117 | -2579.307258 | -2579.432654 |
| Cat95  | -2789.698317 | -2789.002501 | -2789.124502 |
| Cat96  | -2425.915258 | -2425.217099 | -2425.321905 |
| Cat97  | -2410.845616 | -2410.174137 | -2410.279352 |
| Cat98  | -2942.078035 | -2941.291776 | -2941.407311 |
| Cat99  | -2815.850602 | -2815.245910 | -2815.349775 |
| Cat100 | -2826.267654 | -2825.535263 | -2825.646884 |
| Cat101 | -3782.921015 | -3782.227828 | -3782.351080 |
| Cat102 | -2889.279420 | -2888.575142 | -2888.697660 |
| Cat103 | -2853.367056 | -2852.639928 | -2852.763558 |
| Cat104 | -2636.073632 | -2635.425402 | -2635.540229 |
| Cat105 | -2711.304794 | -2710.651224 | -2710.768118 |
| Cat106 | -2675.392265 | -2674.715722 | -2674.833446 |
| Cat107 | -3858.153809 | -3857.454220 | -3857.576234 |
| Cat108 | -3822.241529 | -3821.520572 | -3821.646596 |
| Cat109 | -3861.558493 | -3860.809093 | -3860.937403 |
| Cat110 | -3822.240508 | -3821.518950 | -3821.643038 |

|        |              |              |              |
|--------|--------------|--------------|--------------|
| Cat111 | -3897.471933 | -3896.744746 | -3896.873134 |
| Cat112 | -3861.559223 | -3860.808974 | -3860.938036 |
| Cat113 | -3900.876165 | -3900.097393 | -3900.229470 |
| Cat114 | -3445.817242 | -3445.131829 | -3445.247677 |
| Cat115 | -3521.048666 | -3520.357845 | -3520.475512 |
| Cat116 | -3485.136035 | -3484.422297 | -3484.541089 |
| Cat117 | -3524.452877 | -3523.710854 | -3523.832136 |
| Cat118 | -3842.801777 | -3842.144890 | -3842.267224 |
| Cat119 | -3918.033156 | -3917.370793 | -3917.494729 |
| Cat120 | -3882.120468 | -3881.435379 | -3881.560674 |
| Cat121 | -3921.437237 | -3920.723620 | -3920.850779 |
| Cat122 | -2907.354037 | -2906.684134 | -2906.802591 |
| Cat123 | -2061.145384 | -2060.492704 | -2060.593218 |
| Cat124 | -1929.274404 | -1928.622967 | -1928.720818 |
| Cat125 | -2364.568544 | -2363.915597 | -2364.015885 |
| Cat126 | -2490.126196 | -2489.472125 | -2489.582169 |
| Cat127 | -3861.557943 | -3860.808360 | -3860.937090 |
| Cat128 | -3900.874095 | -3900.096083 | -3900.228250 |
| Cat129 | -3900.875764 | -3900.096921 | -3900.229540 |
| Cat130 | -3940.191973 | -3939.384781 | -3939.520236 |
| Cat131 | -3230.304899 | -3229.636876 | -3229.756465 |
| Cat132 | -4302.385187 | -4301.459826 | -4301.603902 |
| Cat133 | -2735.353875 | -2734.686427 | -2734.801229 |
| Cat134 | -2603.473195 | -2602.807193 | -2602.919370 |
| Cat135 | -3038.765128 | -3038.097361 | -3038.211954 |
| Cat136 | -2490.126885 | -2489.472519 | -2489.581980 |
| Cat137 | -9793.152545 | -9792.461428 | -9792.587619 |
| Cat138 | -9832.472681 | -9831.753748 | -9831.882951 |
| Cat139 | -4662.039394 | -4661.327598 | -4661.465714 |
| Cat140 | -9871.788867 | -9871.041299 | -9871.173455 |
| Cat141 | -3078.083785 | -3077.387839 | -3077.505384 |
| Cat142 | -3117.400097 | -3116.675634 | -3116.795981 |
| Cat143 | -5042.095821 | -5041.430686 | -5041.547216 |
| Cat144 | -5081.414539 | -5080.721101 | -5080.840493 |
| Cat145 | -5120.730943 | -5120.009132 | -5120.131493 |

## 6. References

- (1) Wodrich, M. D.; Sawatlon, B.; Solel, E.; Kozuch, S.; Corminboeuf, C. Activity-Based Screening of Homogeneous Catalysts through the Rapid Assessment of Theoretically Derived Turnover Frequencies. *ACS Catal.* **2019**, *9* (6), 5716–5725.
- (2) Laplaza, R.; Corminboeuf, C. [icmd-epfl/volcanic DOI: 10.5281/Zenodo.5760797](https://doi.org/10.5281/Zenodo.5760797); 2021.
- (3) Ni, X.; Li, X.; Wang, Z.; Cheng, J.-P. Squaramide Equilibrium Acidities in DMSO. *Org. Lett.* **2014**, *16* (6), 1786–1789.
- (4) Glendening, E. D.; Reed, A. E.; Carpenter, J. E.; Weinhold, F. NBO Version 3.1.
- (5) Chakraborty, D.; Chattaraj, P. K. Conceptual Density Functional Theory Based Electronic Structure Principles. *Chem. Sci.* **2021**, *12* (18), 6264–6279.
- (6) Domingo, L. R.; Ríos-Gutiérrez, M.; Pérez, P. Applications of the Conceptual Density Functional Theory Indices to Organic Chemistry Reactivity. *Molecules* **2016**, *21* (6).
- (7) Gupta, K.; Roy, D. R.; Subramanian, V.; Chattaraj, P. K. Are Strong Brønsted Acids Necessarily Strong Lewis Acids? *J. Mol. Struct. - THEOCHEM* **2007**, *812* (1), 13–24.
- (8) Brethomé, A. V.; Fletcher, S. P.; Paton, R. S. Conformational Effects on Physical-Organic Descriptors: The Case of Sterimol Steric Parameters. *ACS Catal.* **2019**, *9* (3), 2313–2323.
- (9) Lu, T.; Wheeler, S. E. Origin of the Superior Performance of (Thio)Squaramides over (Thio)Ureas in Organocatalysis. *Chem. Eur. J.* **2013**, *19* (45), 15141–15147.
- (10) Guan, Y.; Ingman, V. M.; Rooks, B. J.; Wheeler, S. E. AARON: An Automated Reaction Optimizer for New Catalysts. *J. Chem. Theory Comput.* **2018**, *14* (10), 5249–5261.
- (11) Jiang, H.; Rodríguez-Esrich, C.; Johansen, T. K.; Davis, R. L.; Jørgensen, K. A. Organocatalytic Activation of Polycyclic Aromatic Compounds for Asymmetric Diels–Alder Reactions. *Angew. Chem. Int. Ed.* **2012**, *51* (41), 10271–10274.
